# Supplementary material
Source: PubMed Central journal article supplement (PMC11331482)

Extended Data Fig. 9a

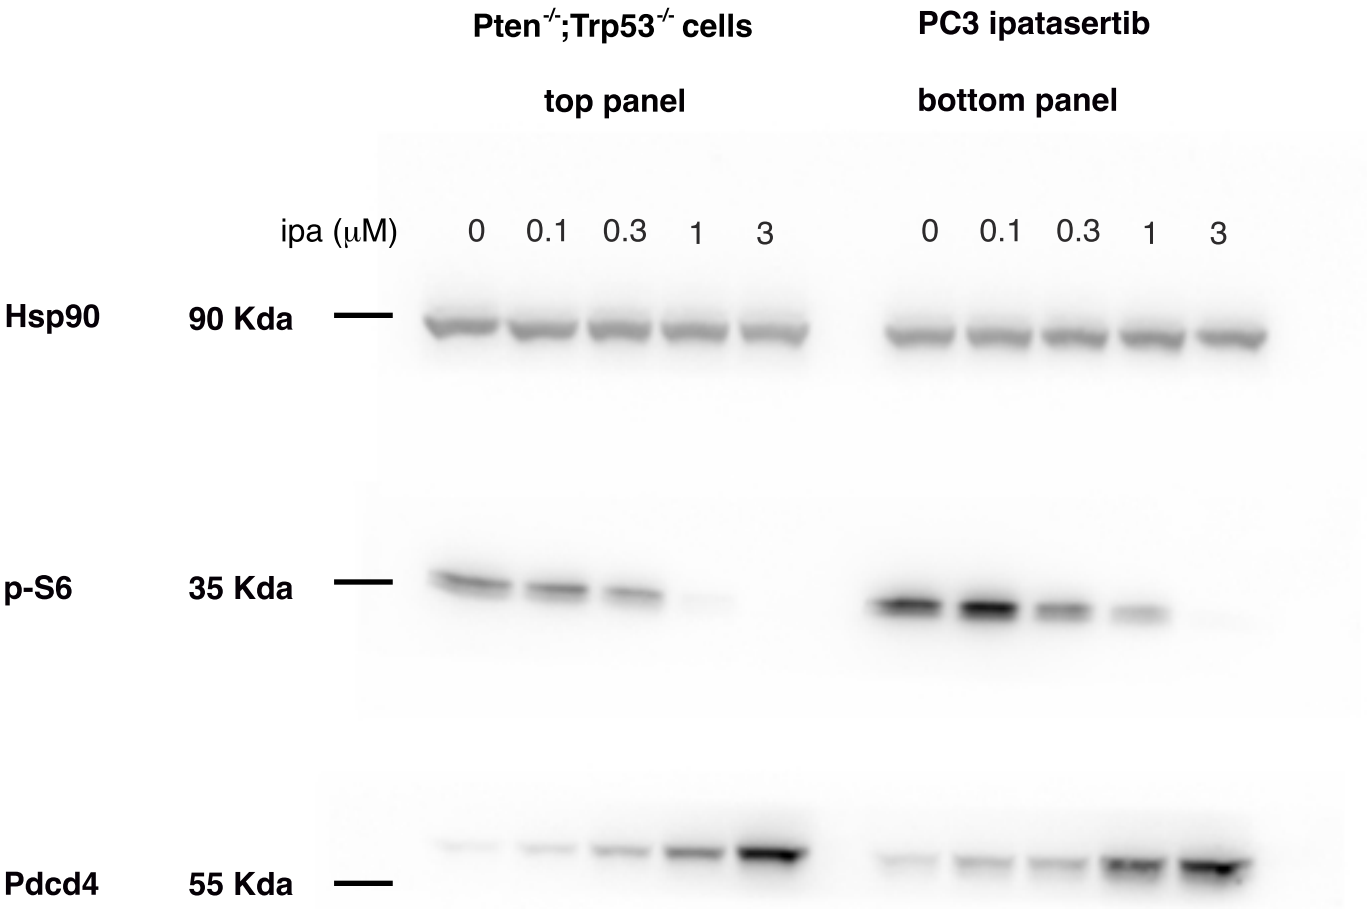

Extended Data Fig. 9b  
top panel

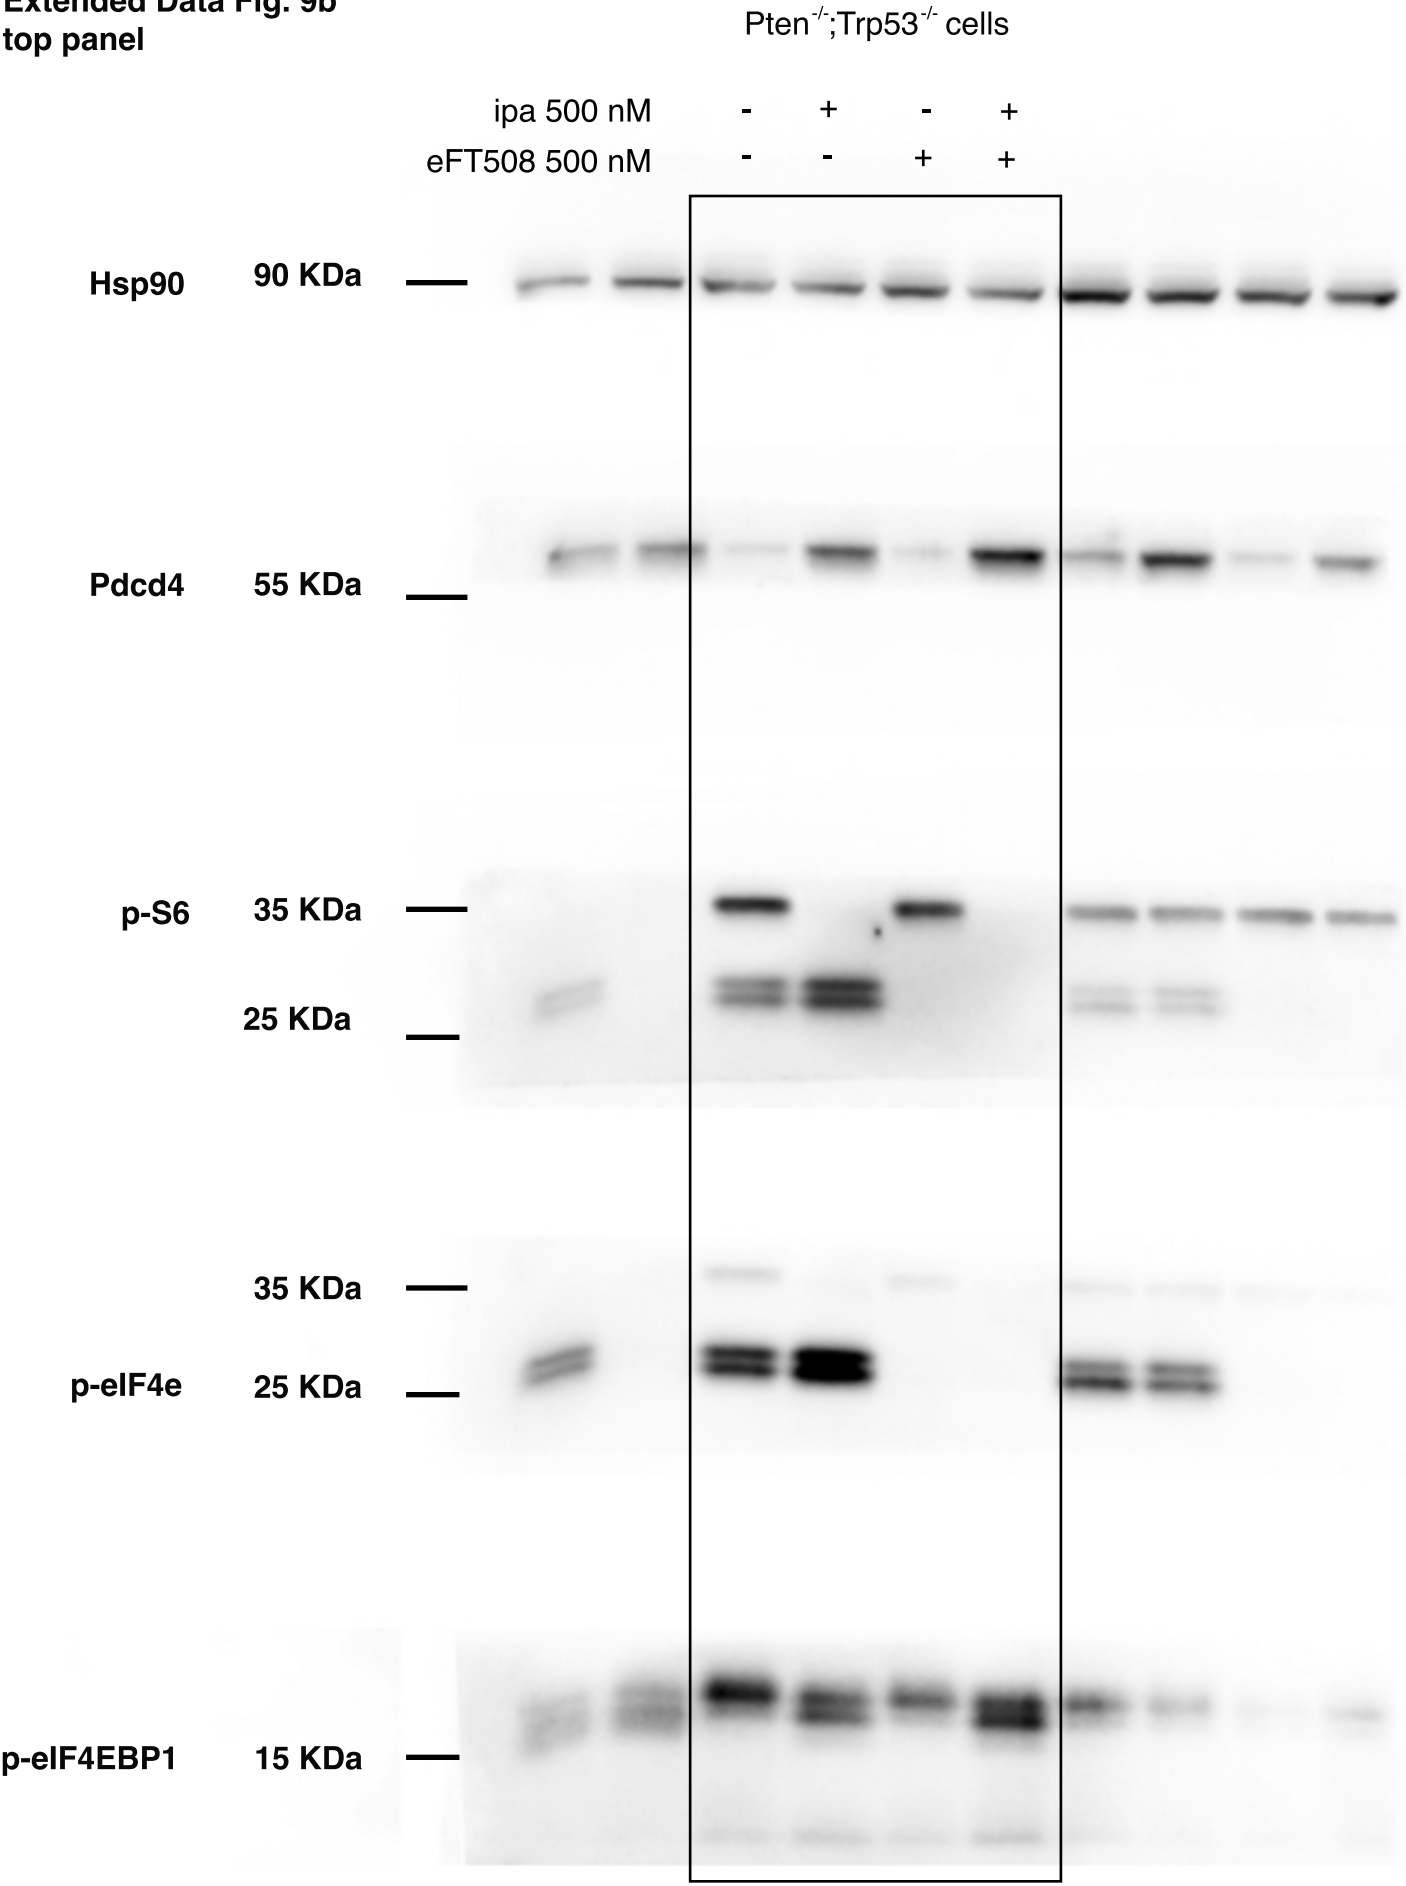

Extended Data Fig. 9b  
bottom panel

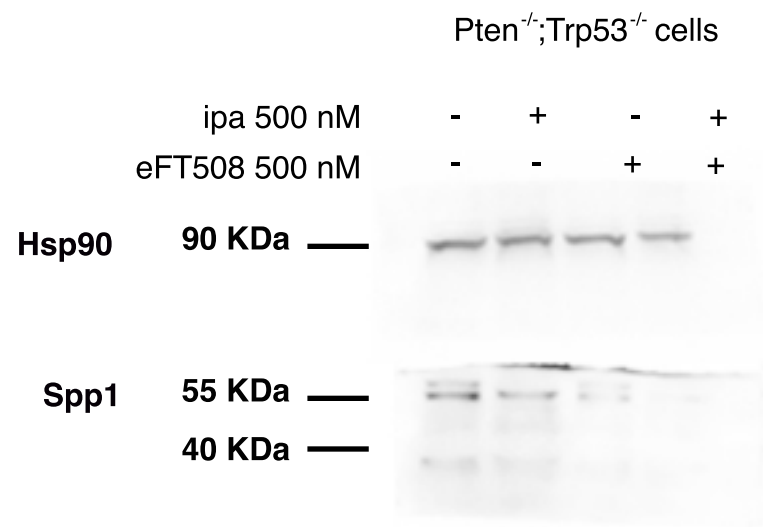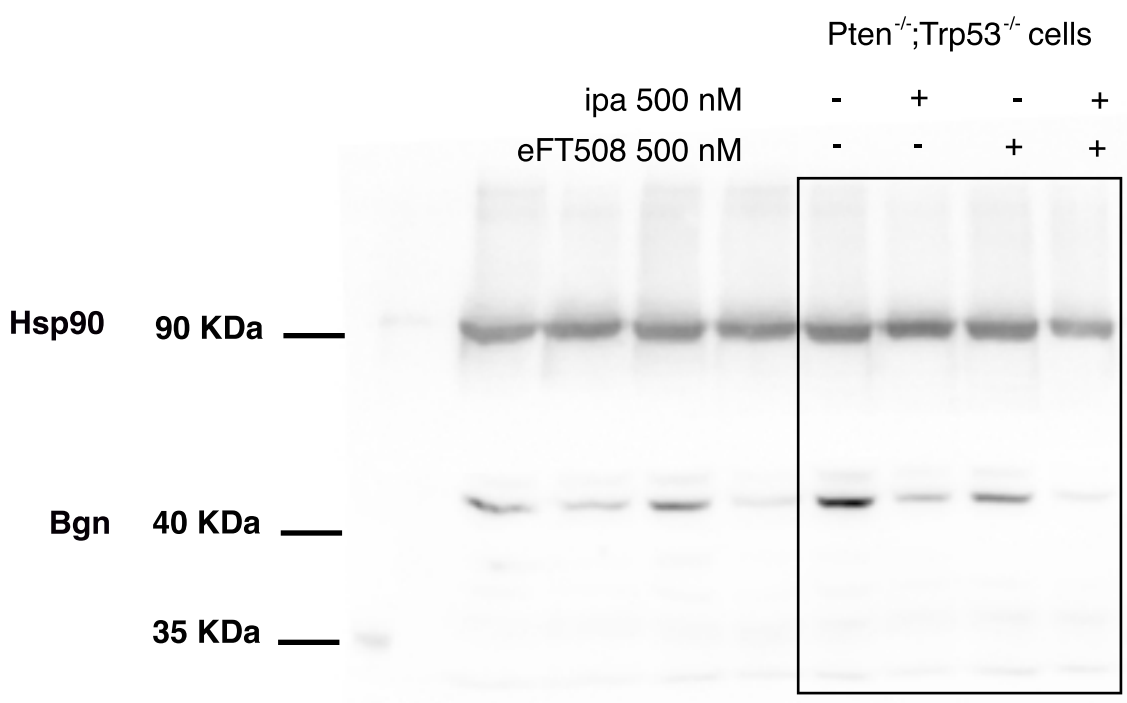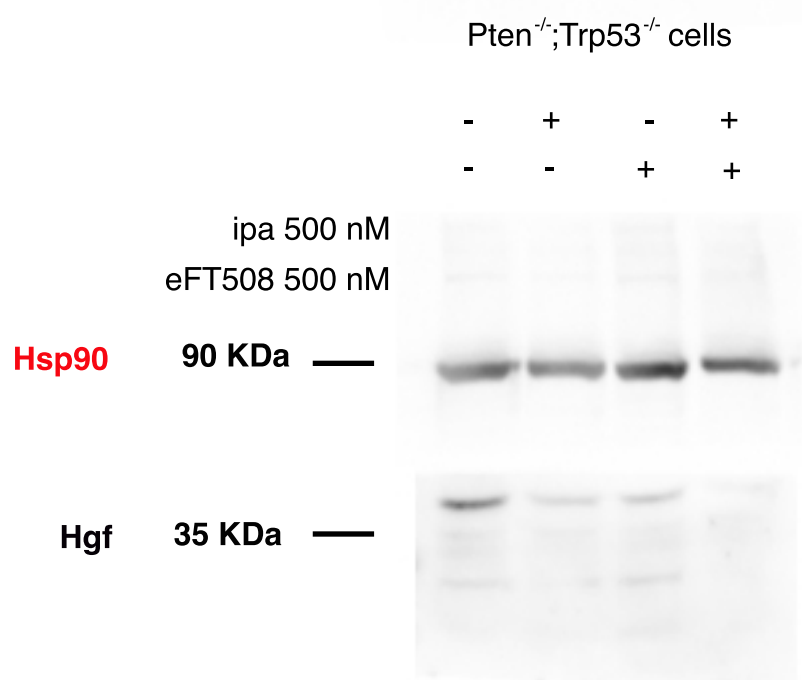

**Extended Data Fig. 9c**  
**top panel**

PC3 cells  
ipa 500 nM - + - +  
eFT508 500 nM - - + +

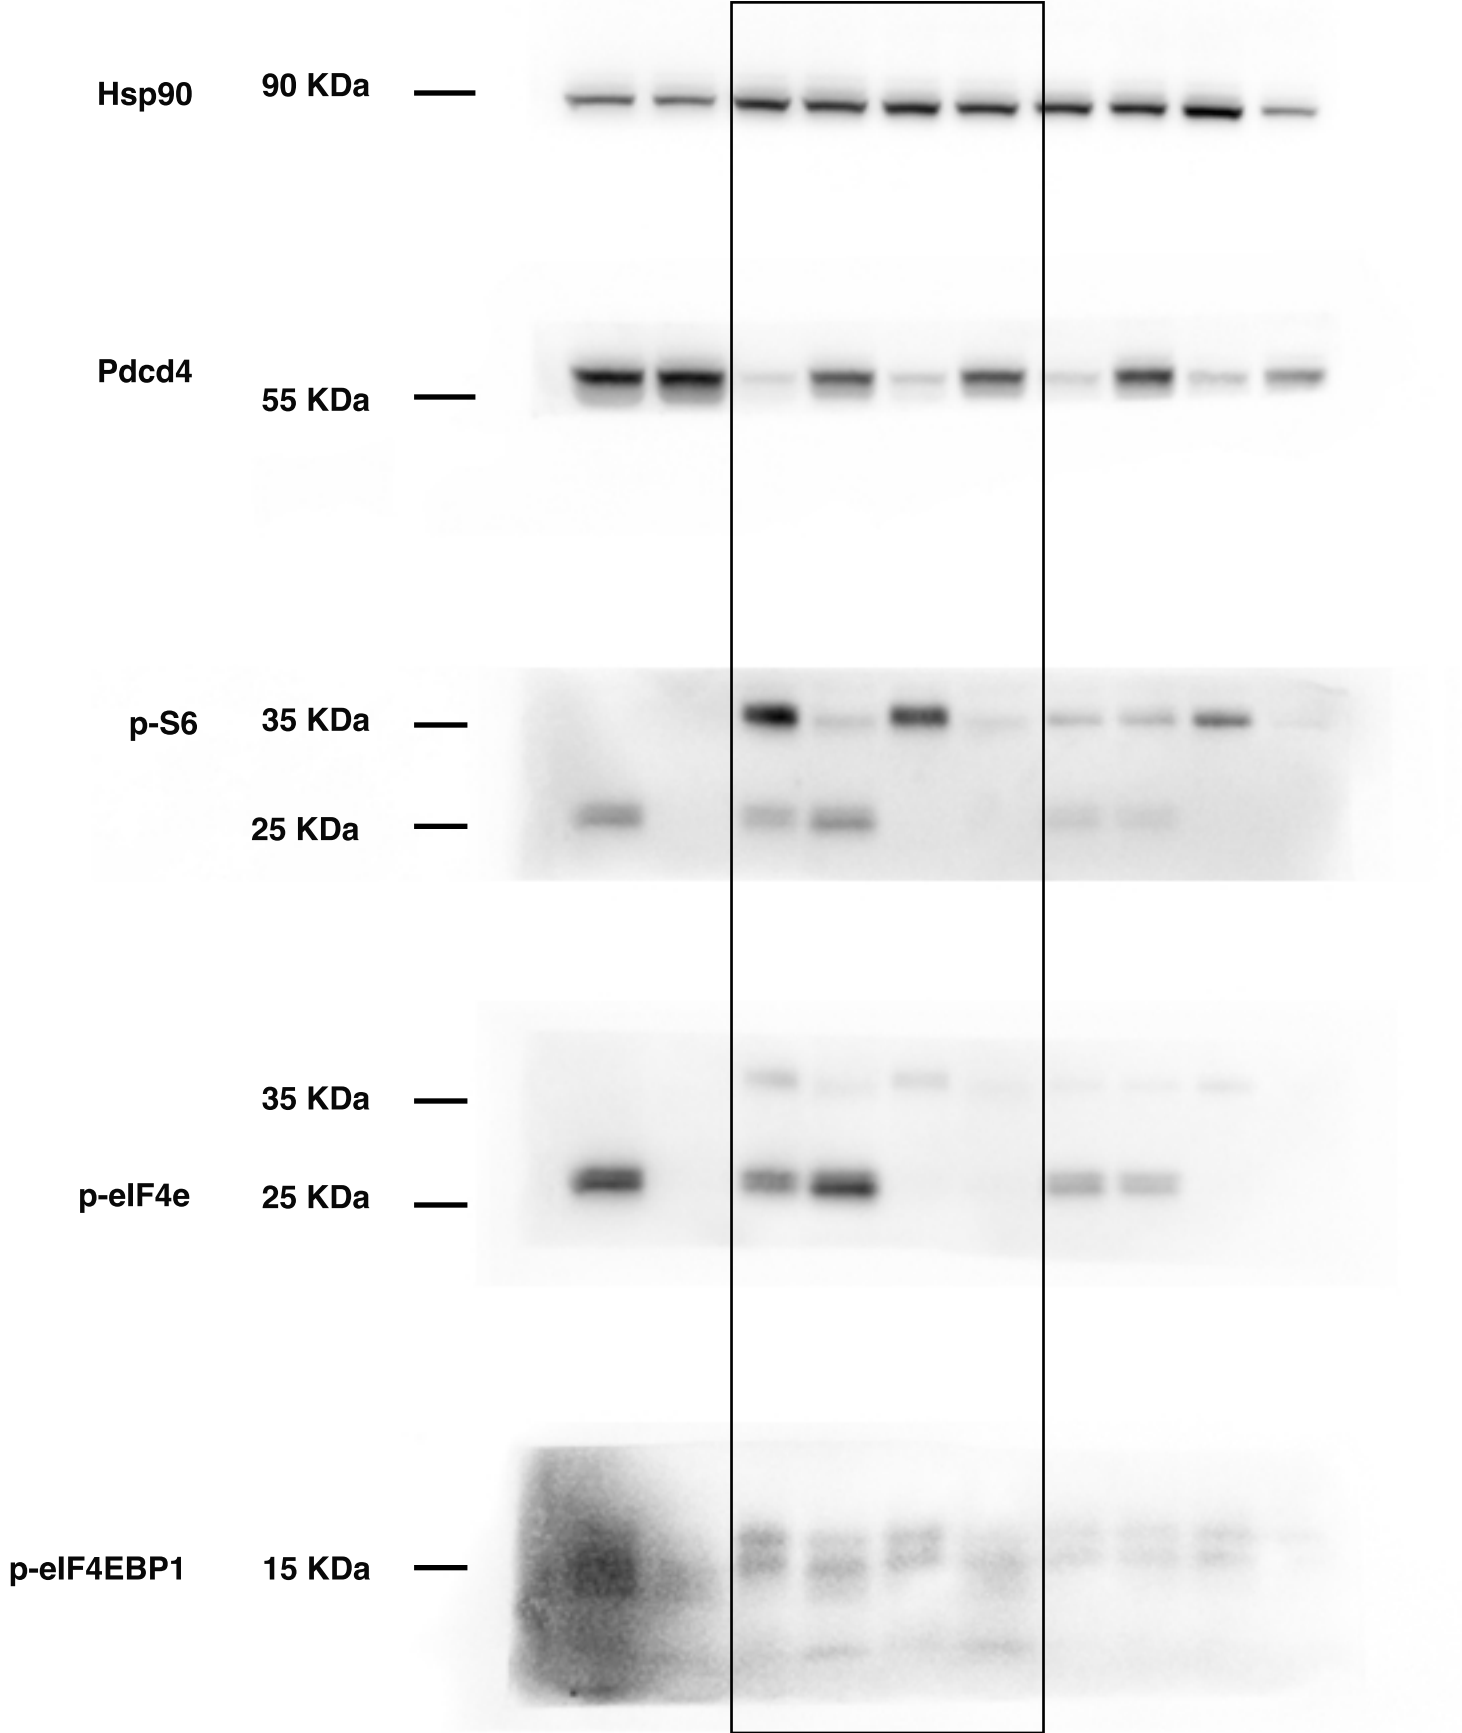

Extended Data Fig. 9c  
bottom panel

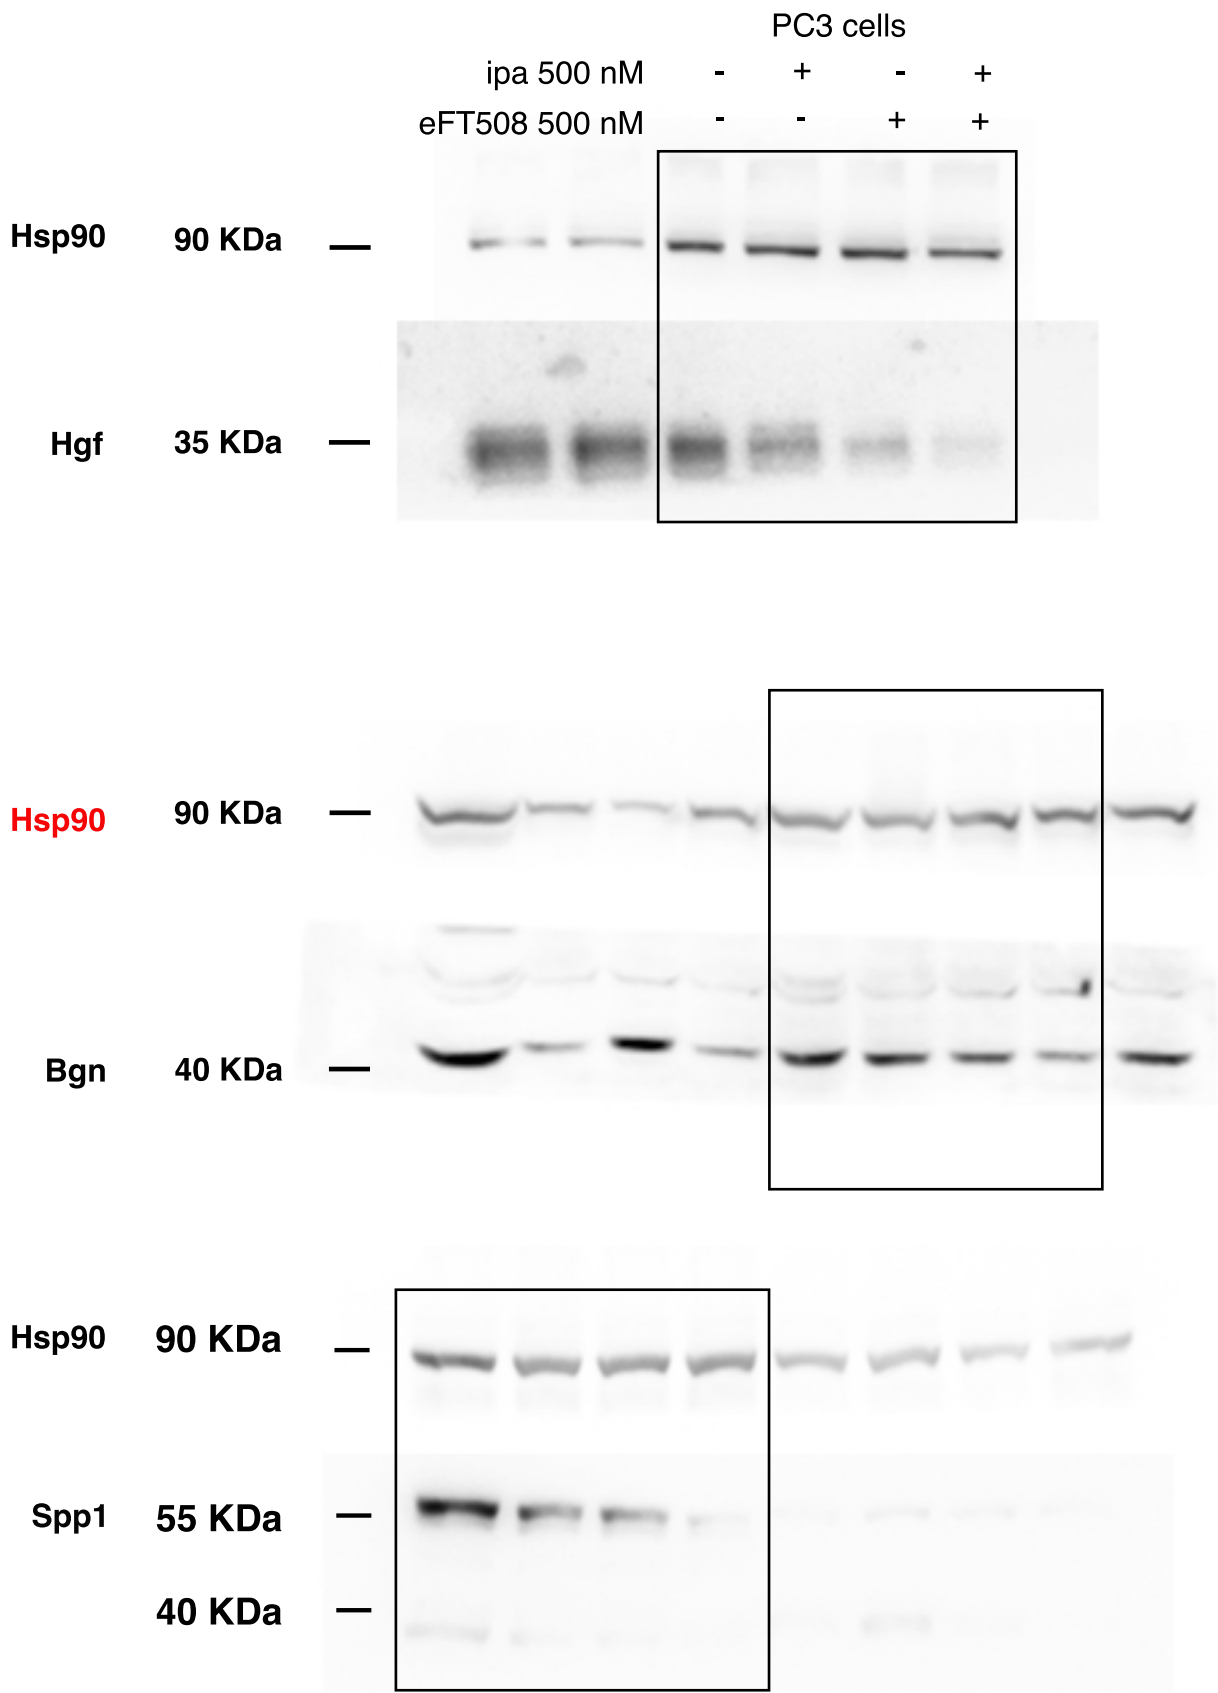

Supplement: NIHMS2010651-supplement-Source_Data_Extended_Data_Fig__9_Unprocessed_Western_Blots.pdf [file NIHMS2010651-supplement-Source_Data_Extended_Data_Fig__9_Unprocessed_Western_Blots.pdf]
