# Supplementary material
Source: PubMed Central journal article supplement (PMC11331482)

Extended Data Fig. 4a

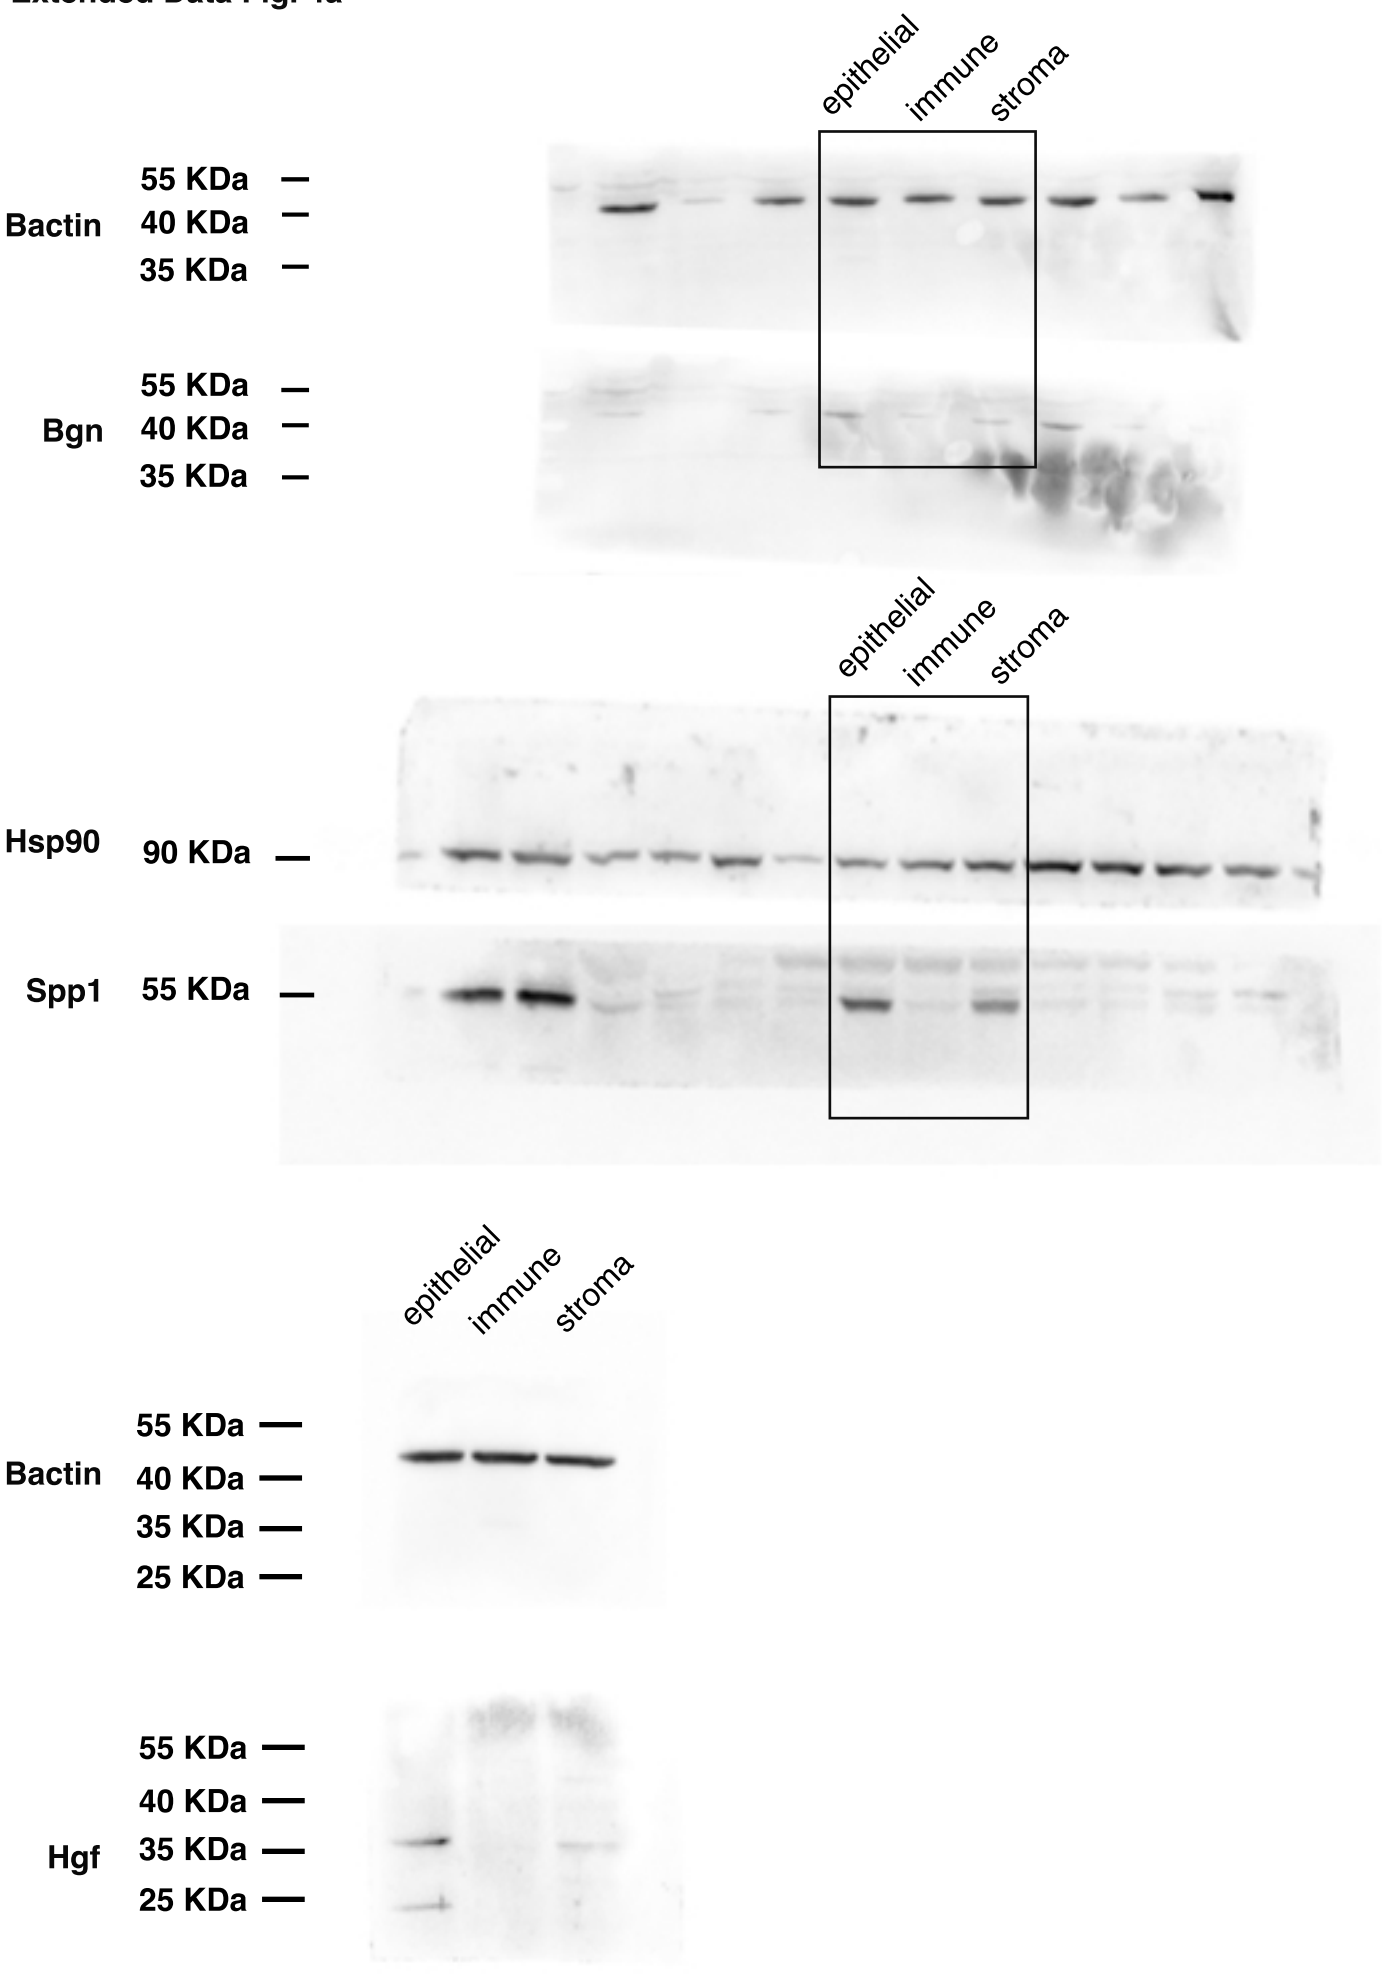

Extended Data Fig. 4h

scramble  
triple KD

Hsp90 90 KDa —

Hgf 35 KDa —

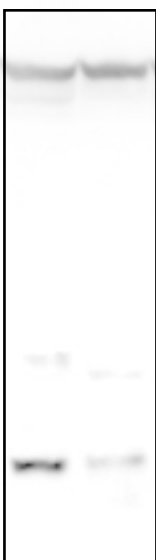

scramble  
triple KD

Hsp90 90 KDa —

Spp1 55 KDa —

40 KDa —

55 KDa —

Bgn 40 KDa —

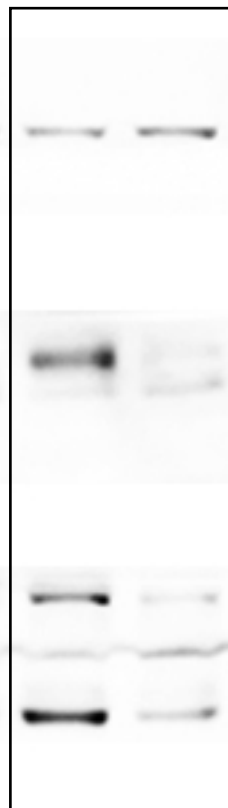

Supplement: NIHMS2010651-supplement-Source_Data_Extended_Fig__4_Unprocessed_Western_Blots.pdf [file NIHMS2010651-supplement-Source_Data_Extended_Fig__4_Unprocessed_Western_Blots.pdf]
