# Supplementary material
Source: PubMed Central journal article supplement (PMC11331482)

Fig. 7d

AZD5069 - + - +  
eFT508 - - + +

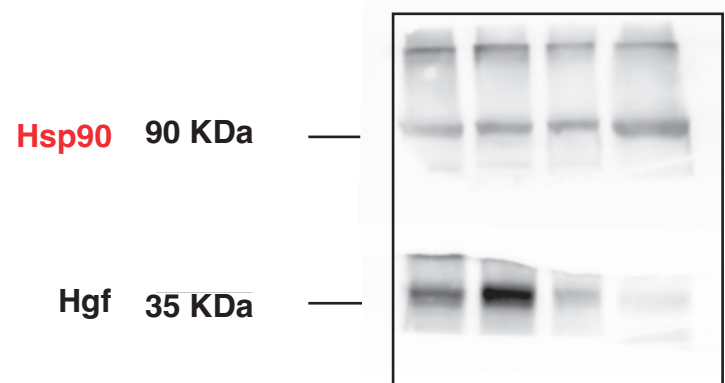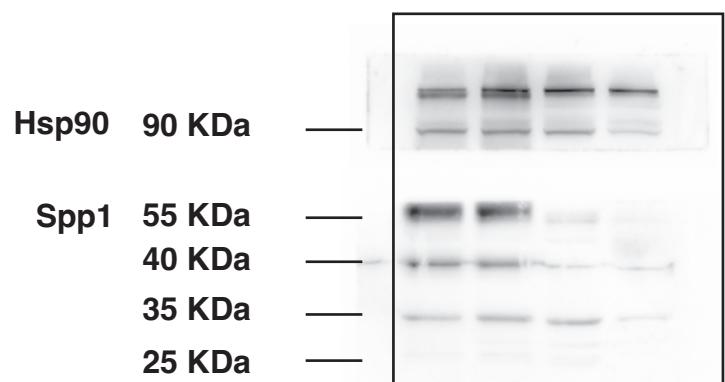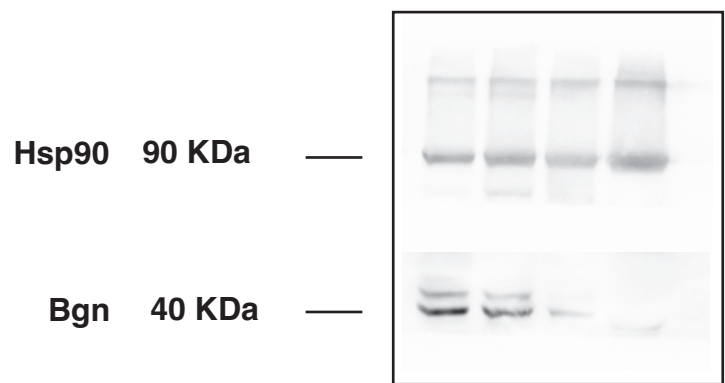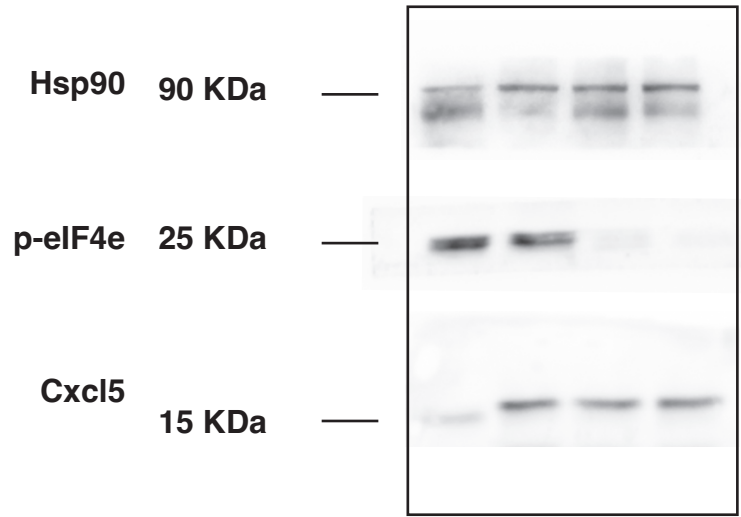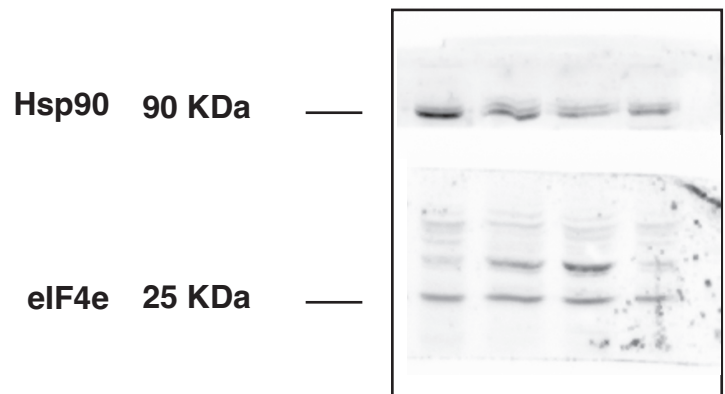

**Fig. 7j**

AZD5069  
ipatasertib

- + - +  
- - + +

**Hsp90** 90 KDa —

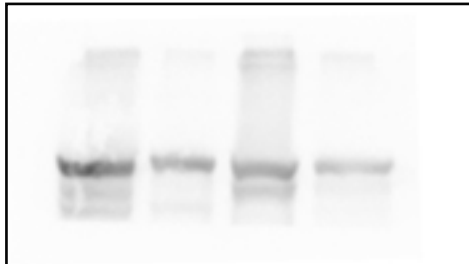

**Bgn** 40 KDa —

35 KDa —

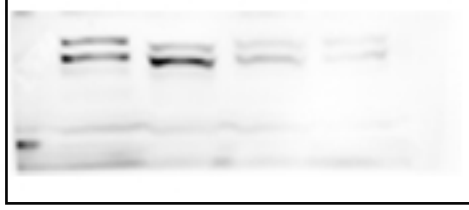

**Hsp90** 90 KDa —

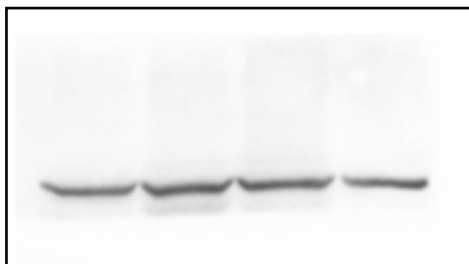

**Spp1** 55 KDa —

40 KDa —

35 KDa —

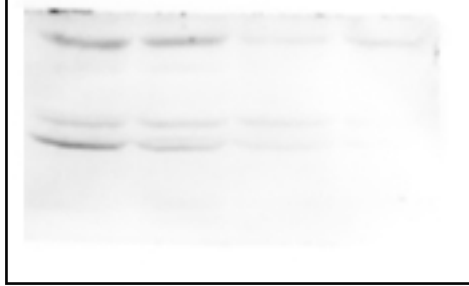

**Hsp90** 90 KDa —

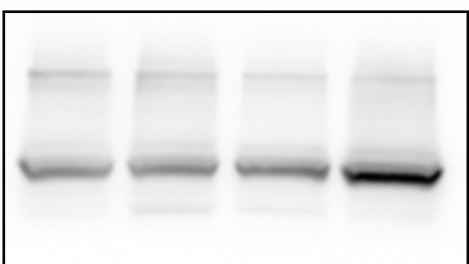

**Hgf** 35 KDa —

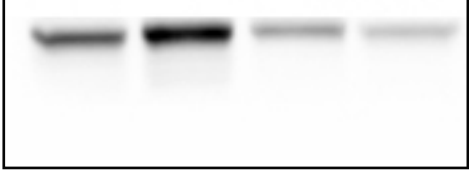

**Hsp90** 90 KDa —

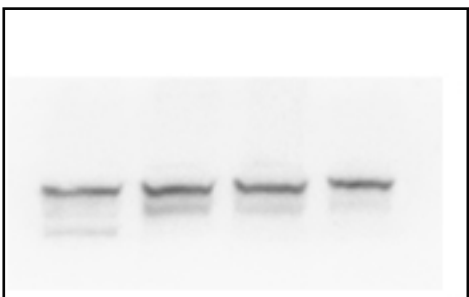

**Cxcl5** 15 KDa —

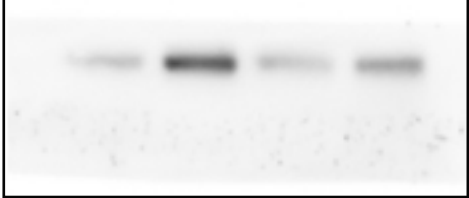

Supplement: NIHMS2010651-supplement-Source_Data_Fig__7_Unprocessed_Western_Blots.pdf [file NIHMS2010651-supplement-Source_Data_Fig__7_Unprocessed_Western_Blots.pdf]
