# Supplementary material
Source: PubMed Central journal article supplement (PMC11331482)

Extended Data Fig. 10b

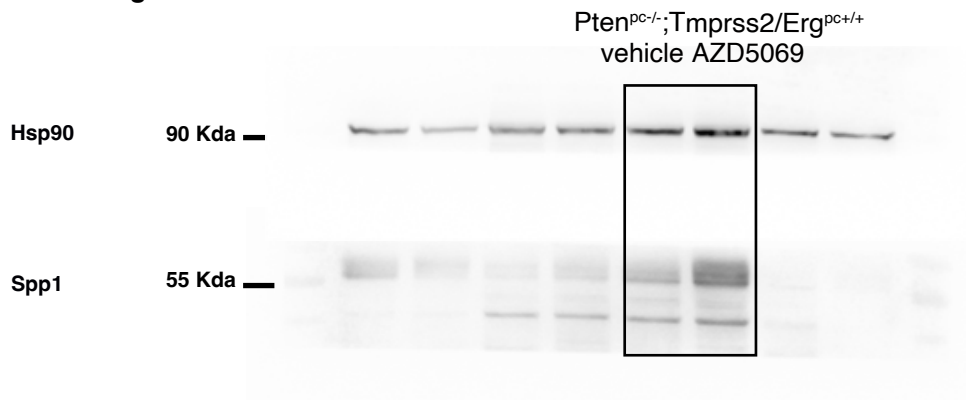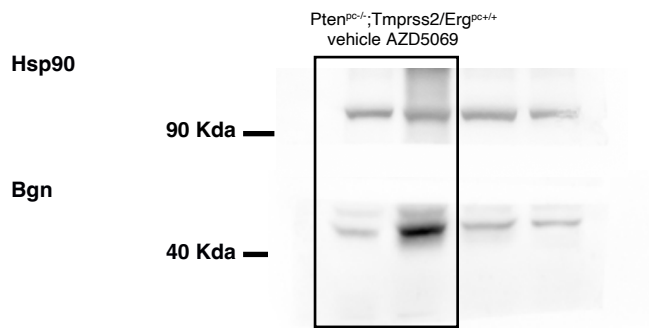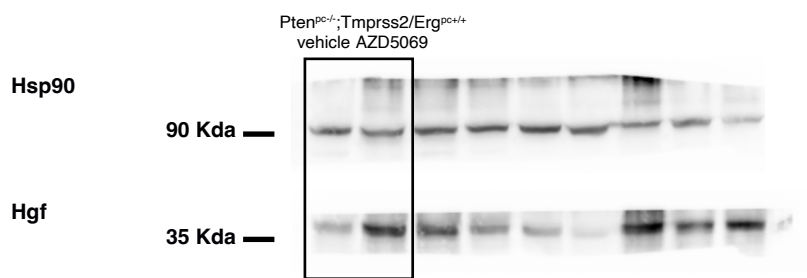

Extended Data Fig. 10c

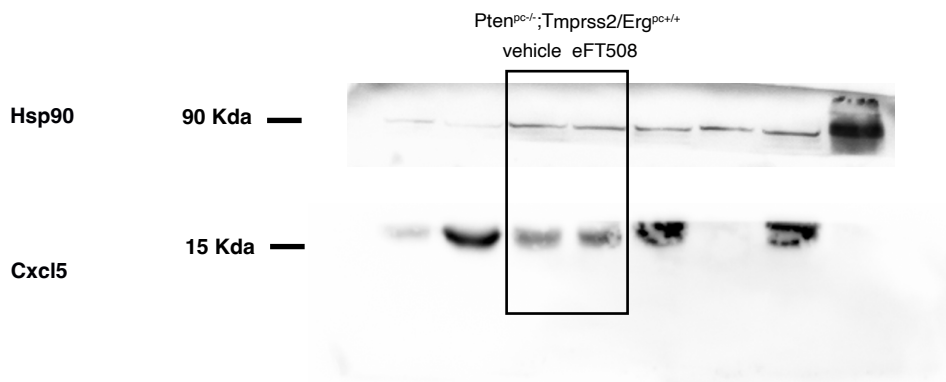

Extended Data Fig. 10g

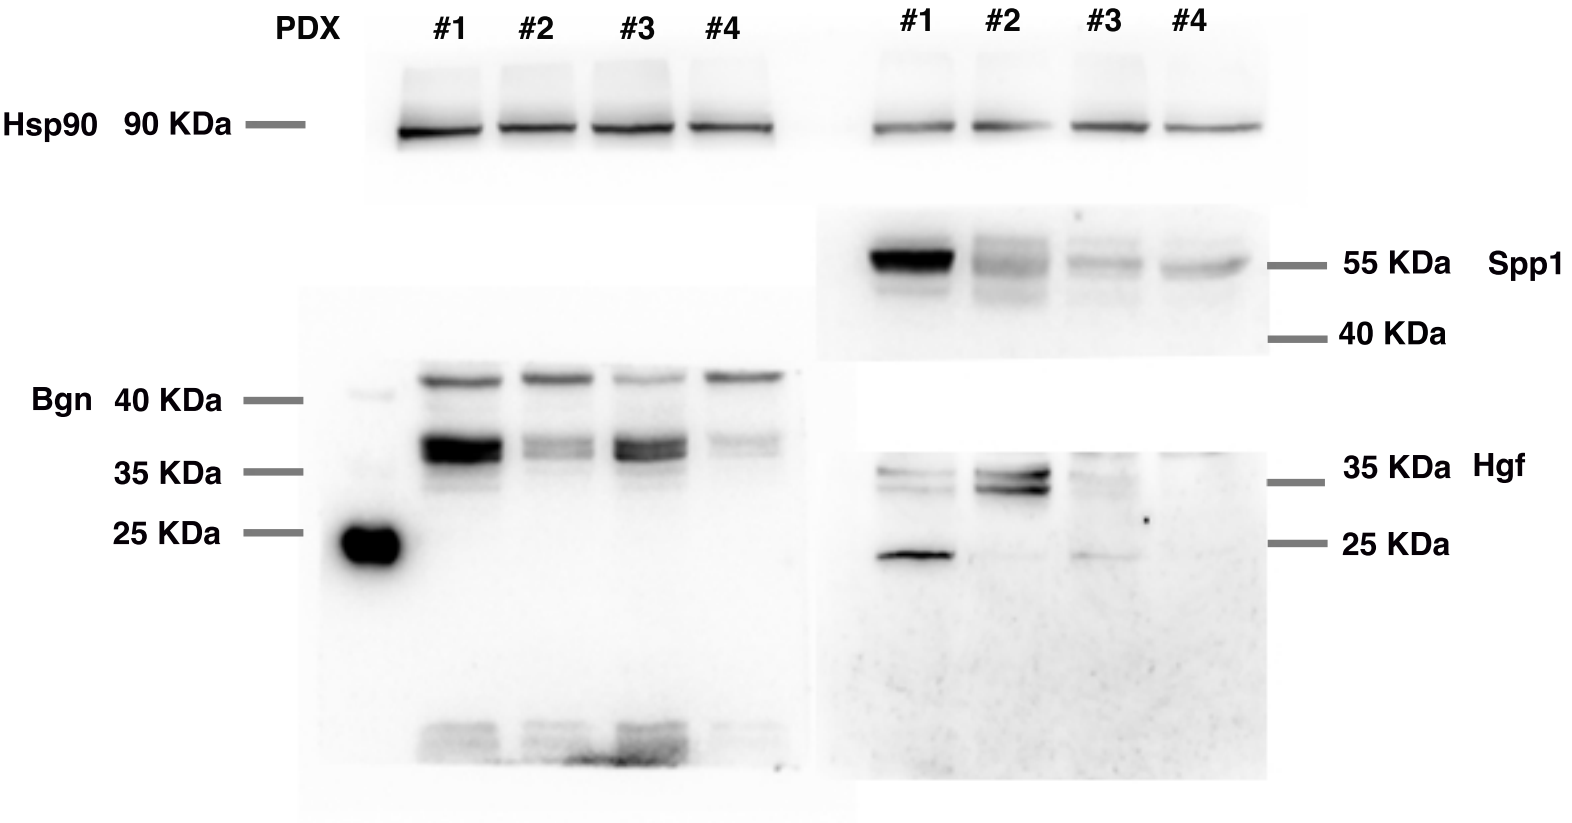

Supplement: NIHMS2010651-supplement-Source_Data_Extended_Data_Fig__10_Unprocessed_Western_Blots.pdf [file NIHMS2010651-supplement-Source_Data_Extended_Data_Fig__10_Unprocessed_Western_Blots.pdf]

Extended Data Fig. 6c

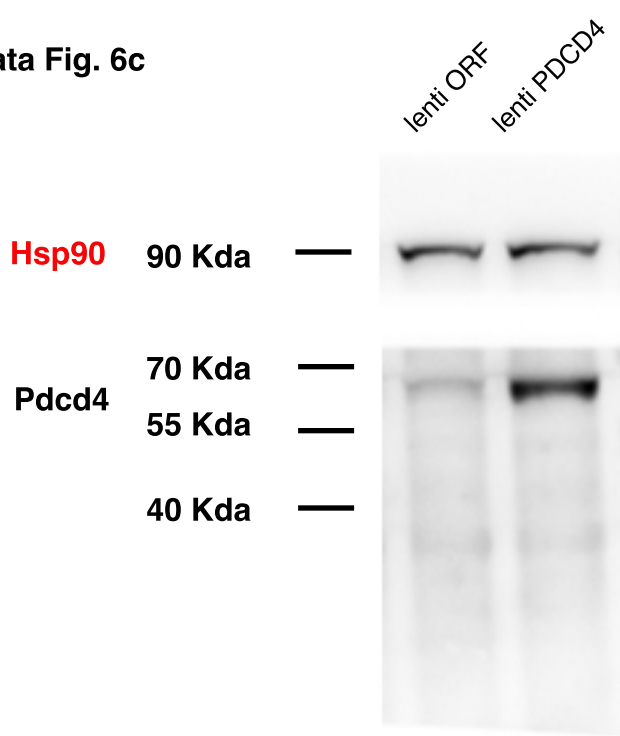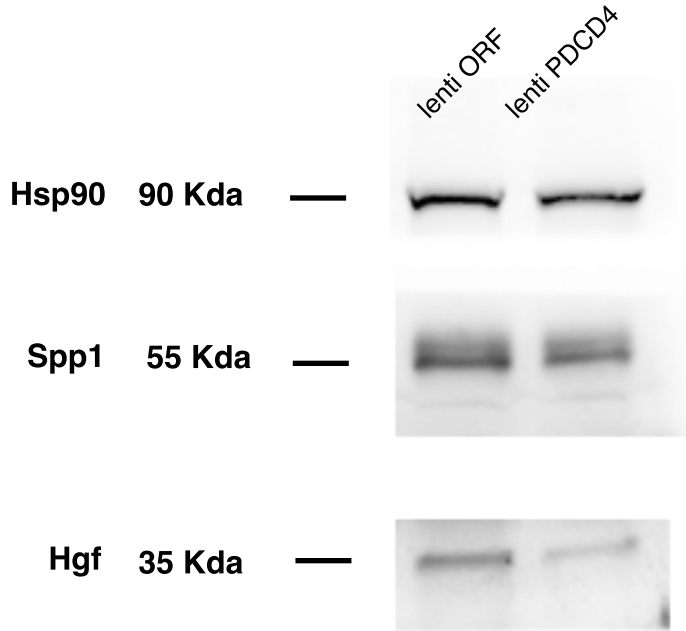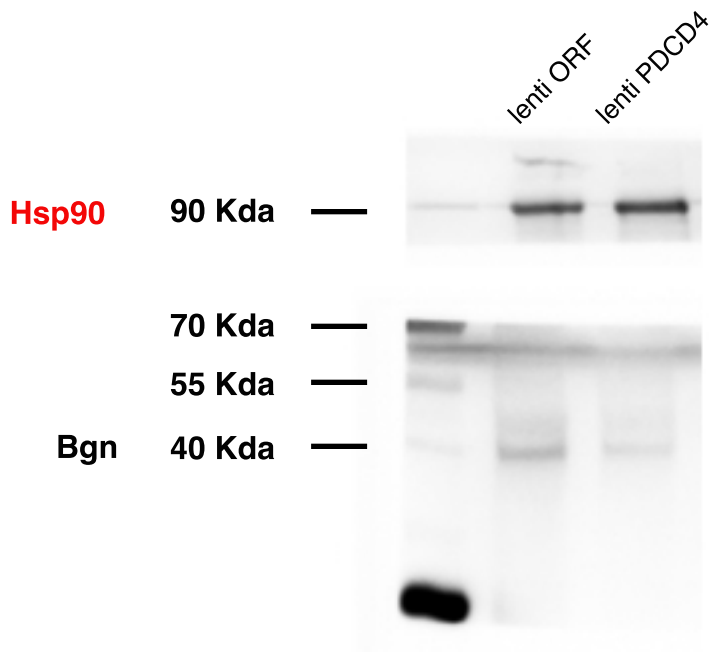

Supplement: NIHMS2010651-supplement-Source_Data_Extended_Data_Fig__6_Unprocessed_Western_Blots.pdf [file NIHMS2010651-supplement-Source_Data_Extended_Data_Fig__6_Unprocessed_Western_Blots.pdf]

Extended Data Fig. 3b

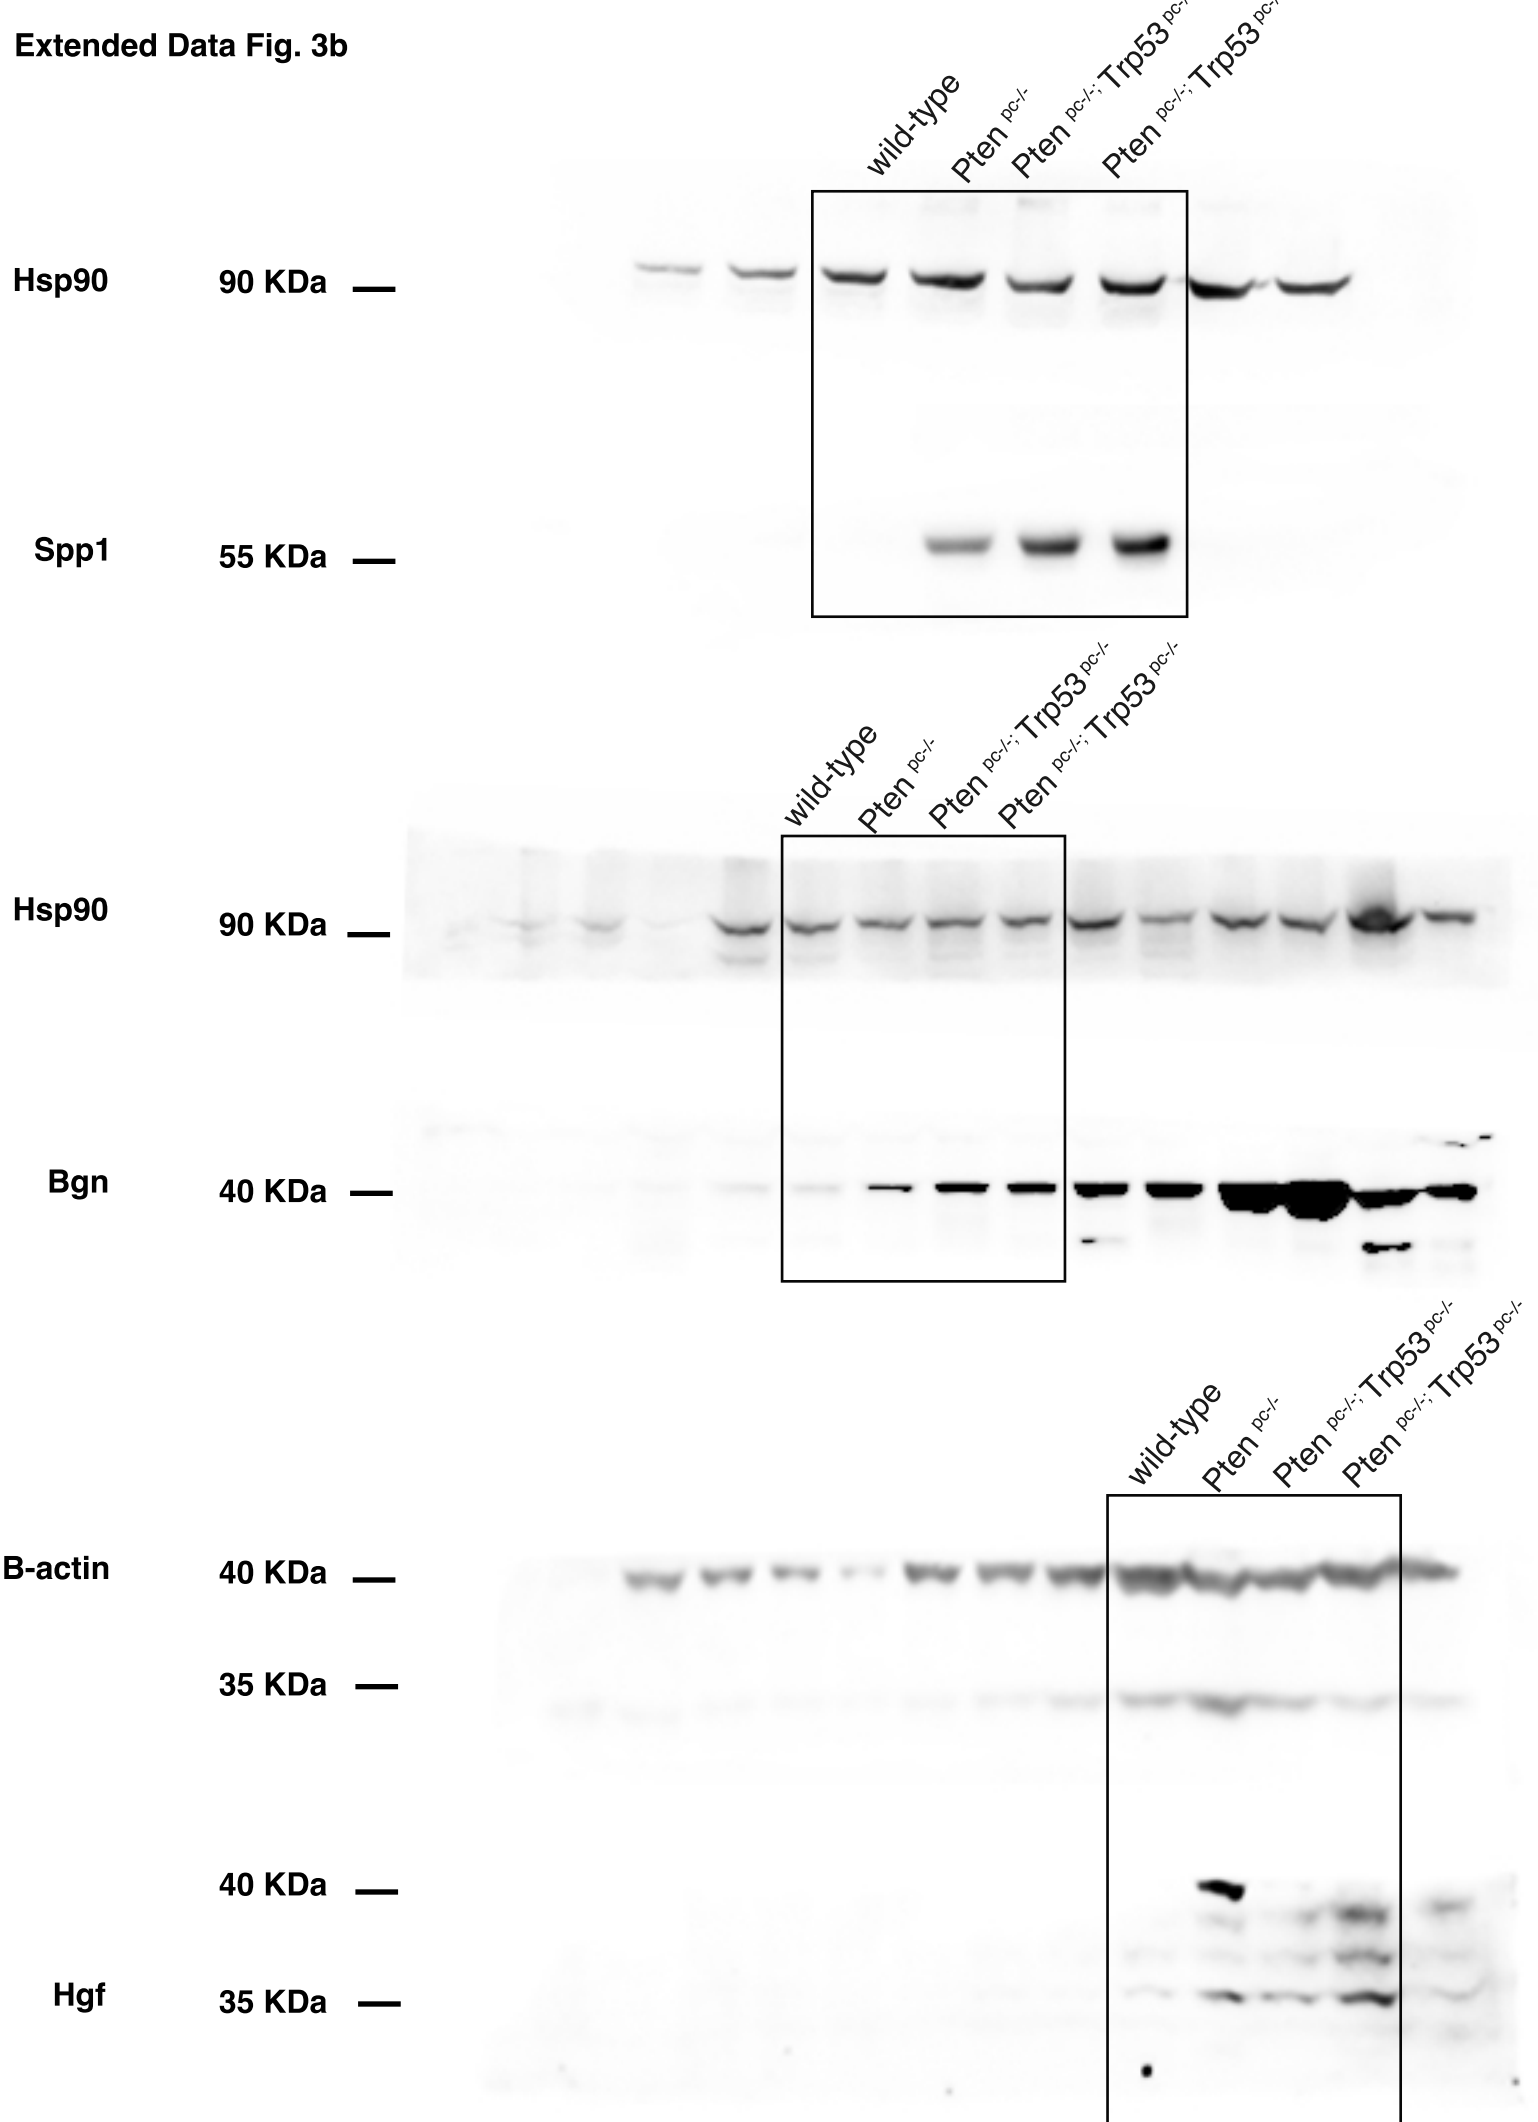

Supplement: NIHMS2010651-supplement-Source_Data_Extended_Fig__3_Unprocessed_Western_Blots.pdf [file NIHMS2010651-supplement-Source_Data_Extended_Fig__3_Unprocessed_Western_Blots.pdf]

Fig. 2c

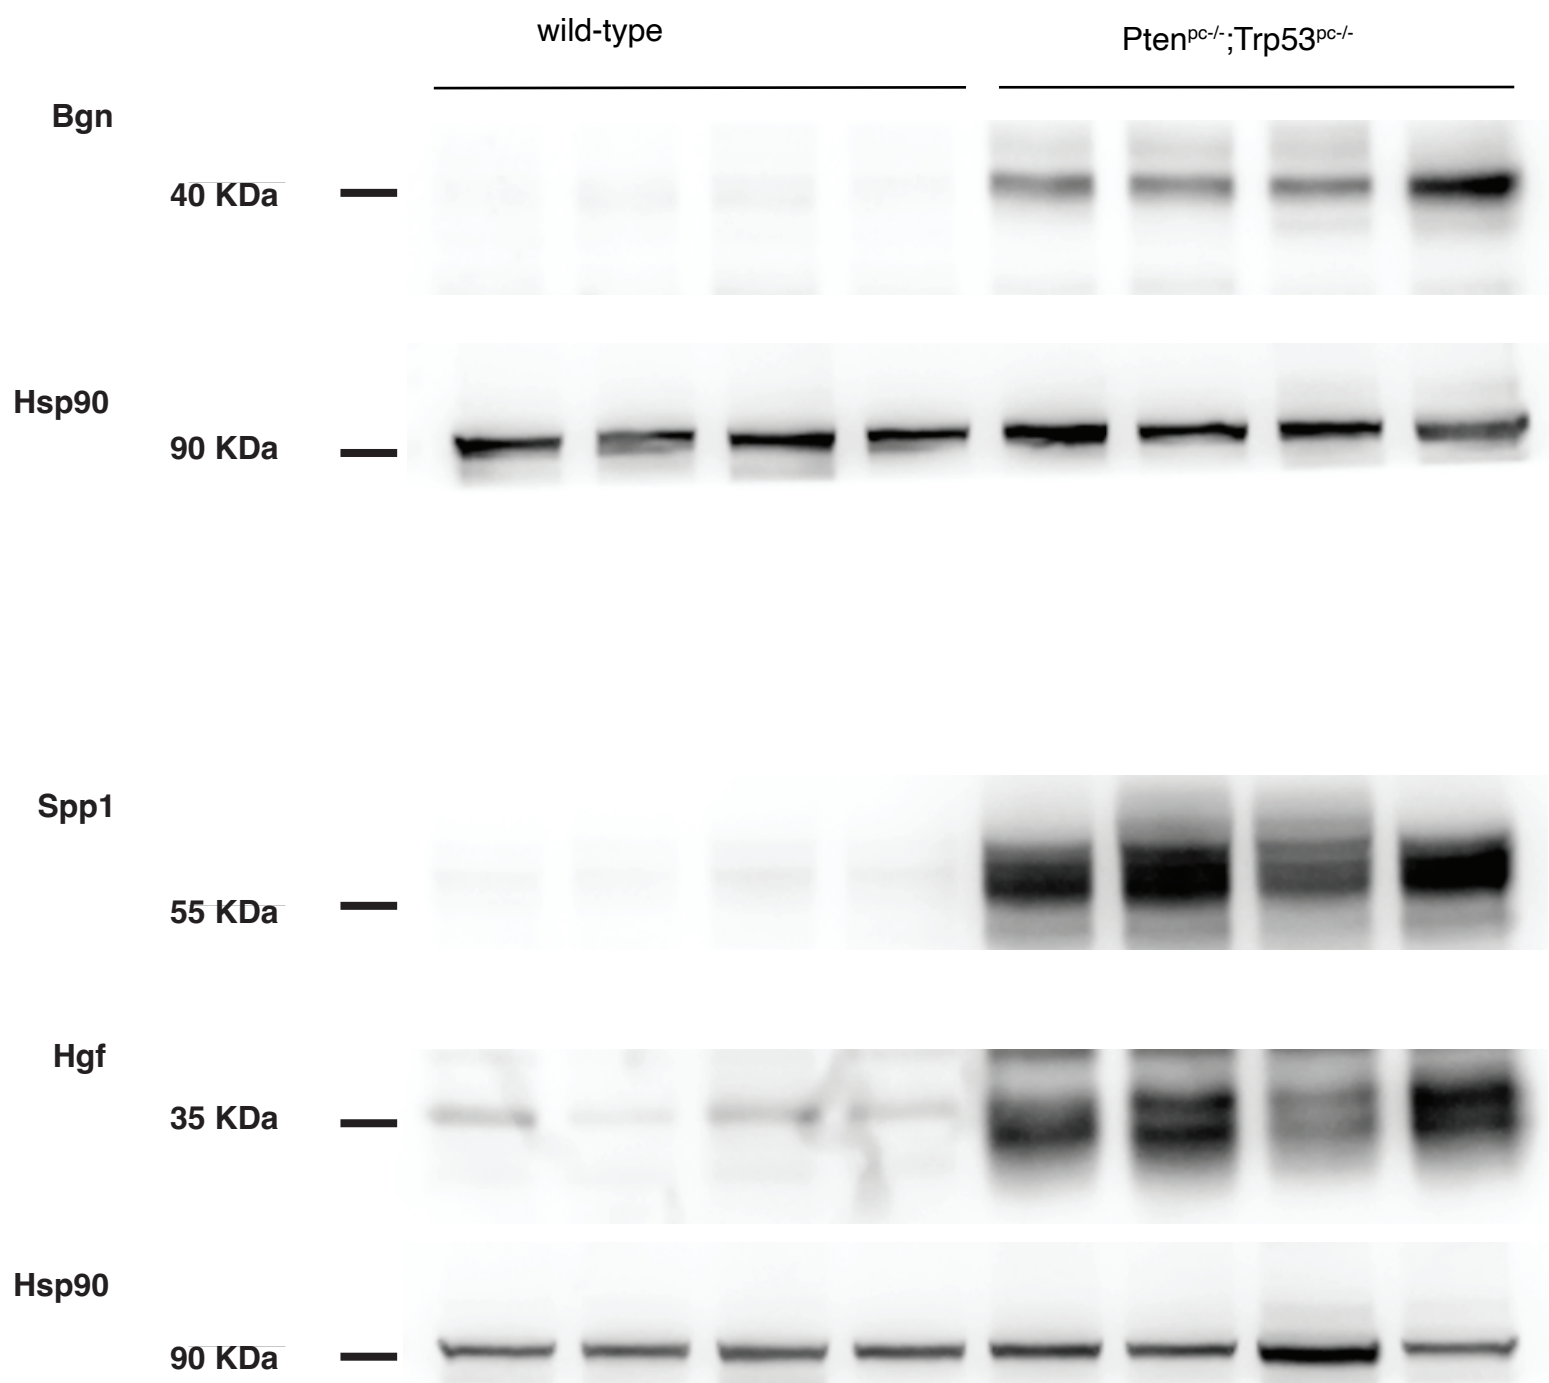

**Fig. 2d**

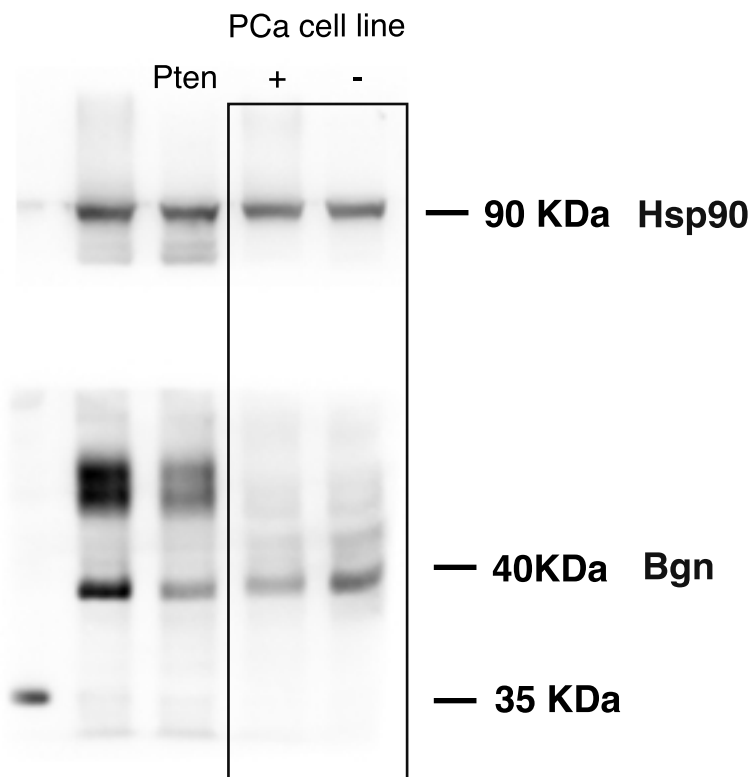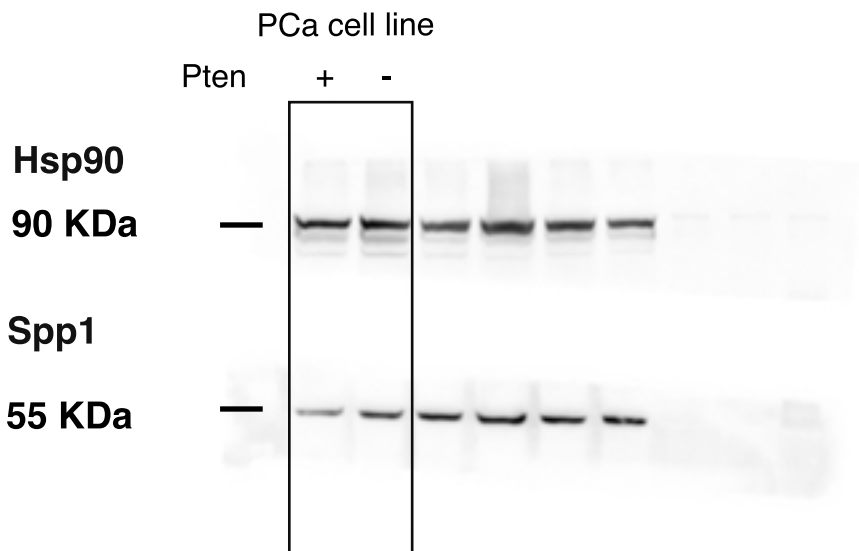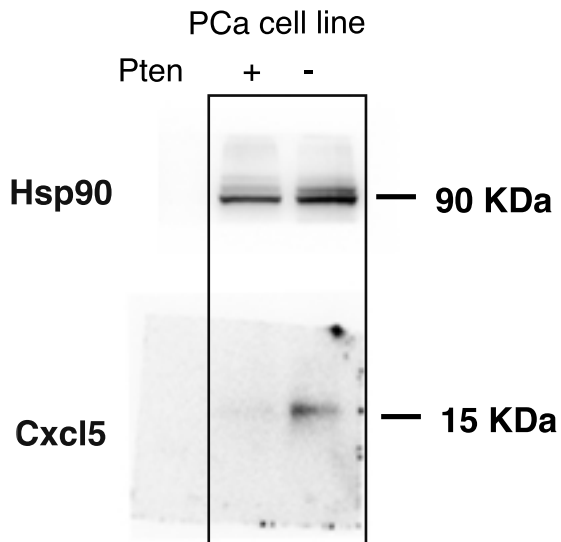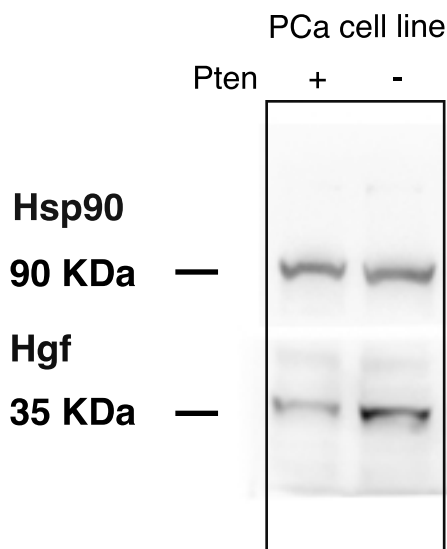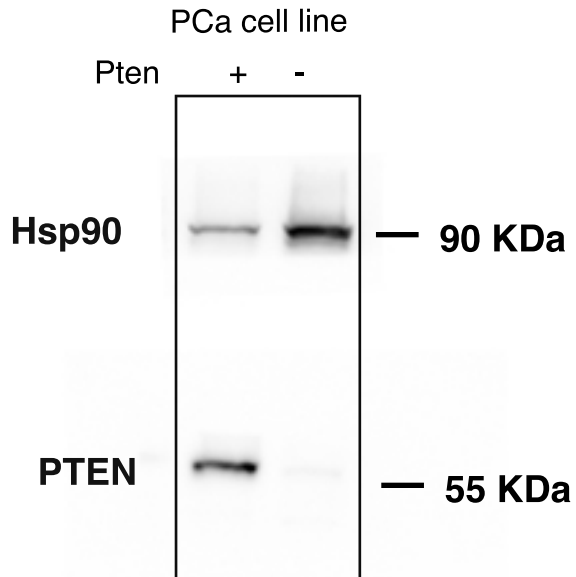

Supplement: NIHMS2010651-supplement-Source_Data_Fig__2_Unprocessed_Western_Blots.pdf [file NIHMS2010651-supplement-Source_Data_Fig__2_Unprocessed_Western_Blots.pdf]

Fig. 4a

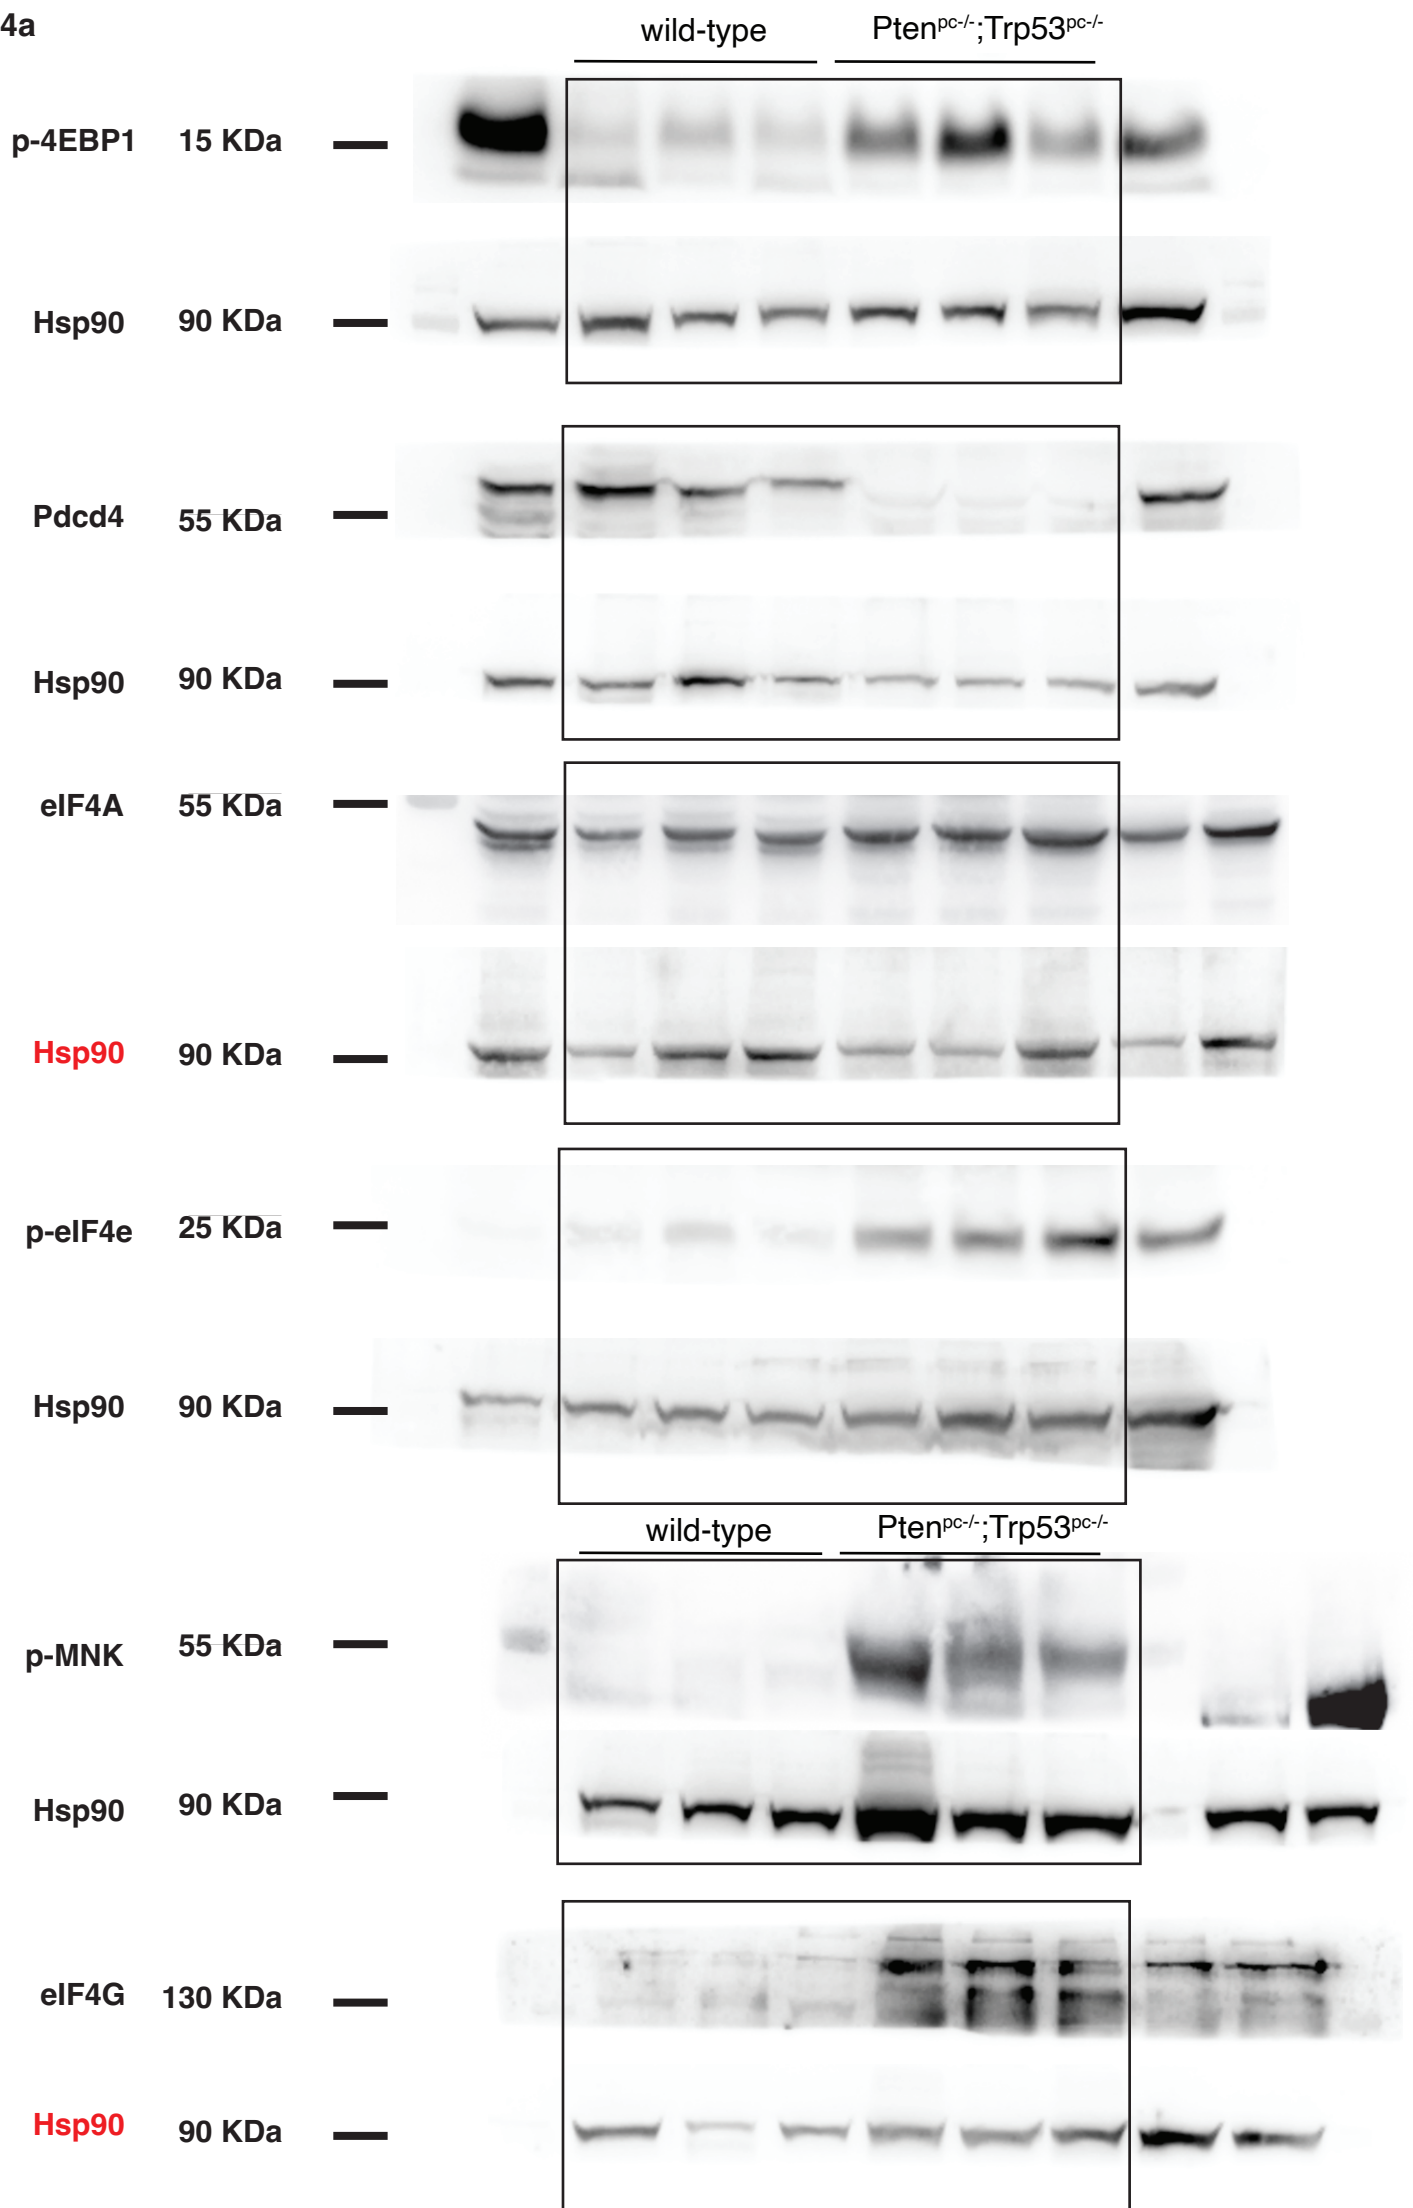

Supplement: NIHMS2010651-supplement-Source_Data_Fig__4_Unprocessed_Western_Blots.pdf [file NIHMS2010651-supplement-Source_Data_Fig__4_Unprocessed_Western_Blots.pdf]

Fig. 5f

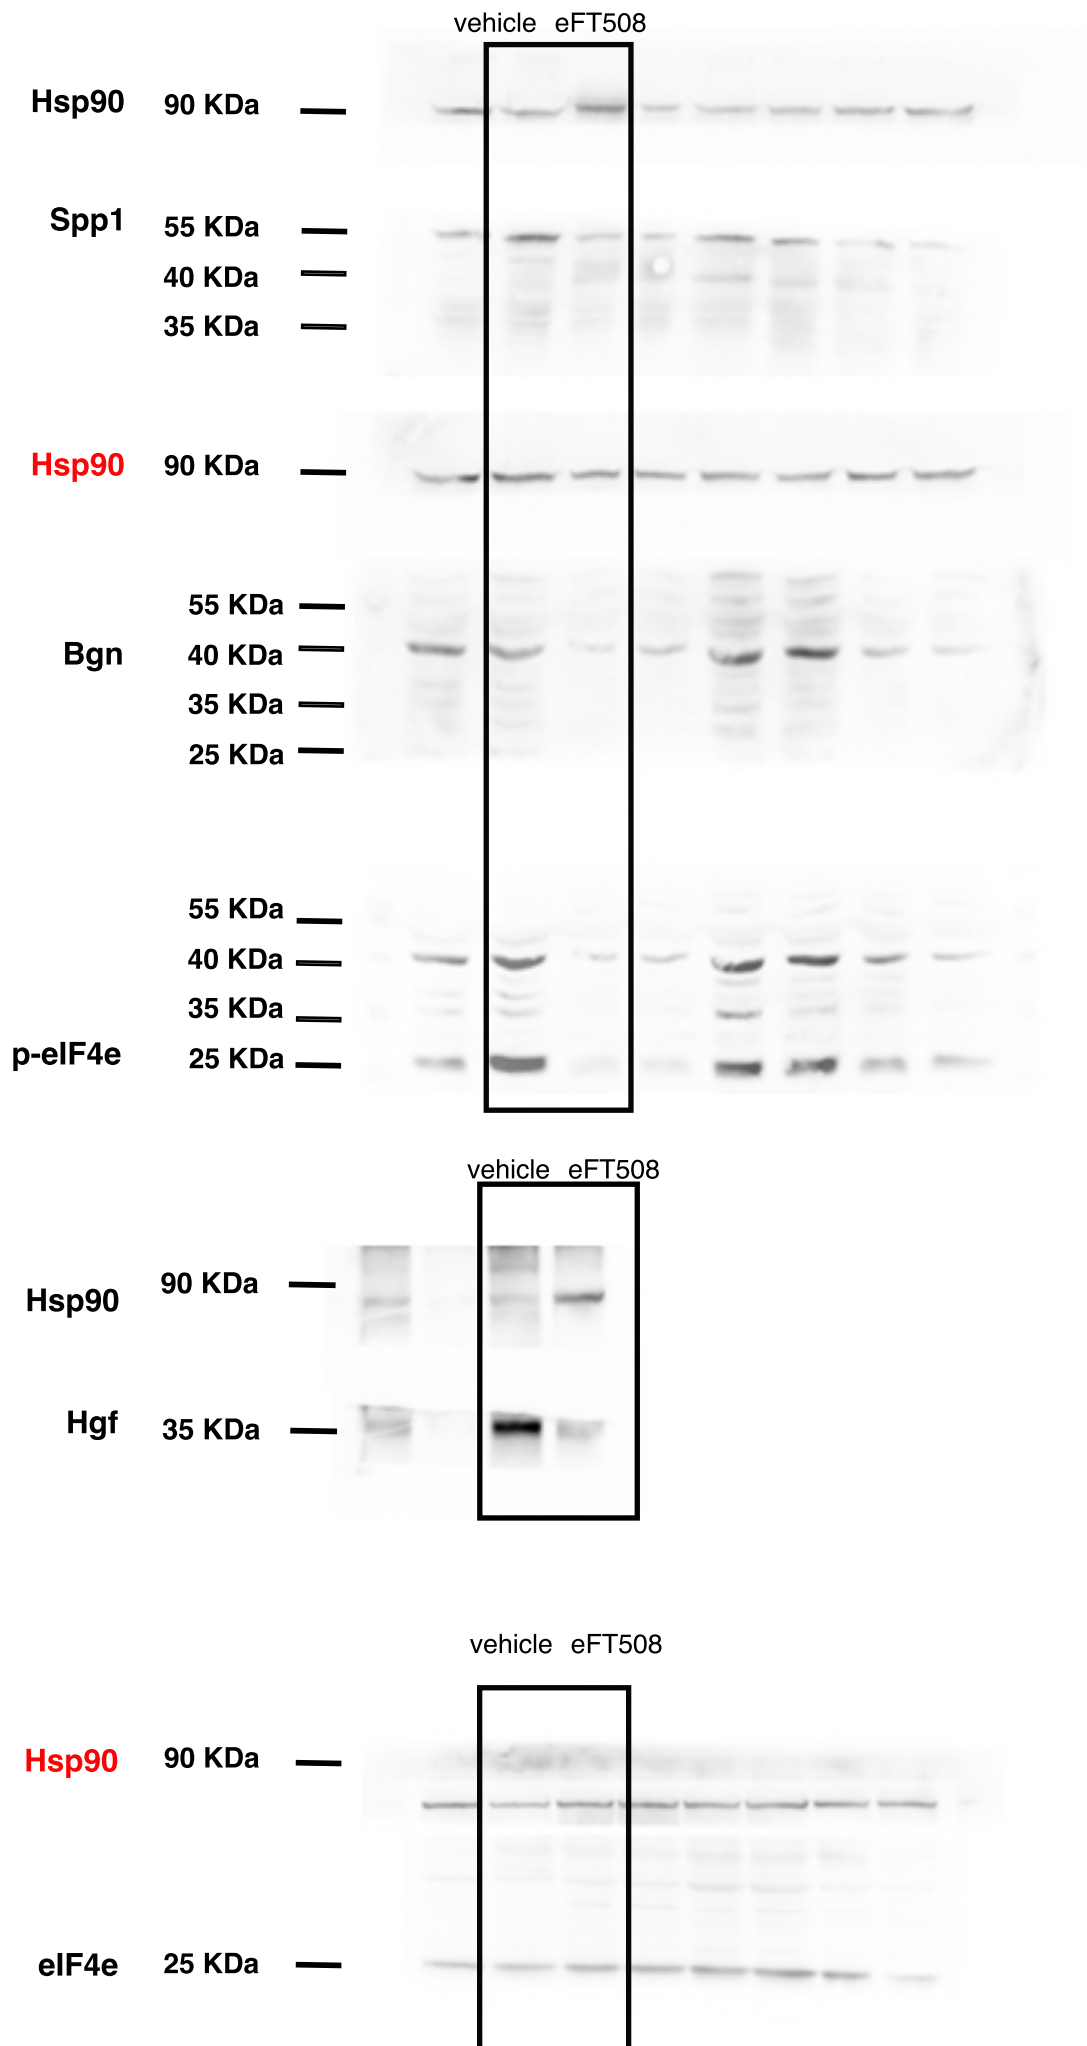

Supplement: NIHMS2010651-supplement-Source_Data_Fig__5_Unprocessed_Western_Blots.pdf [file NIHMS2010651-supplement-Source_Data_Fig__5_Unprocessed_Western_Blots.pdf]

**Fig. 6e**

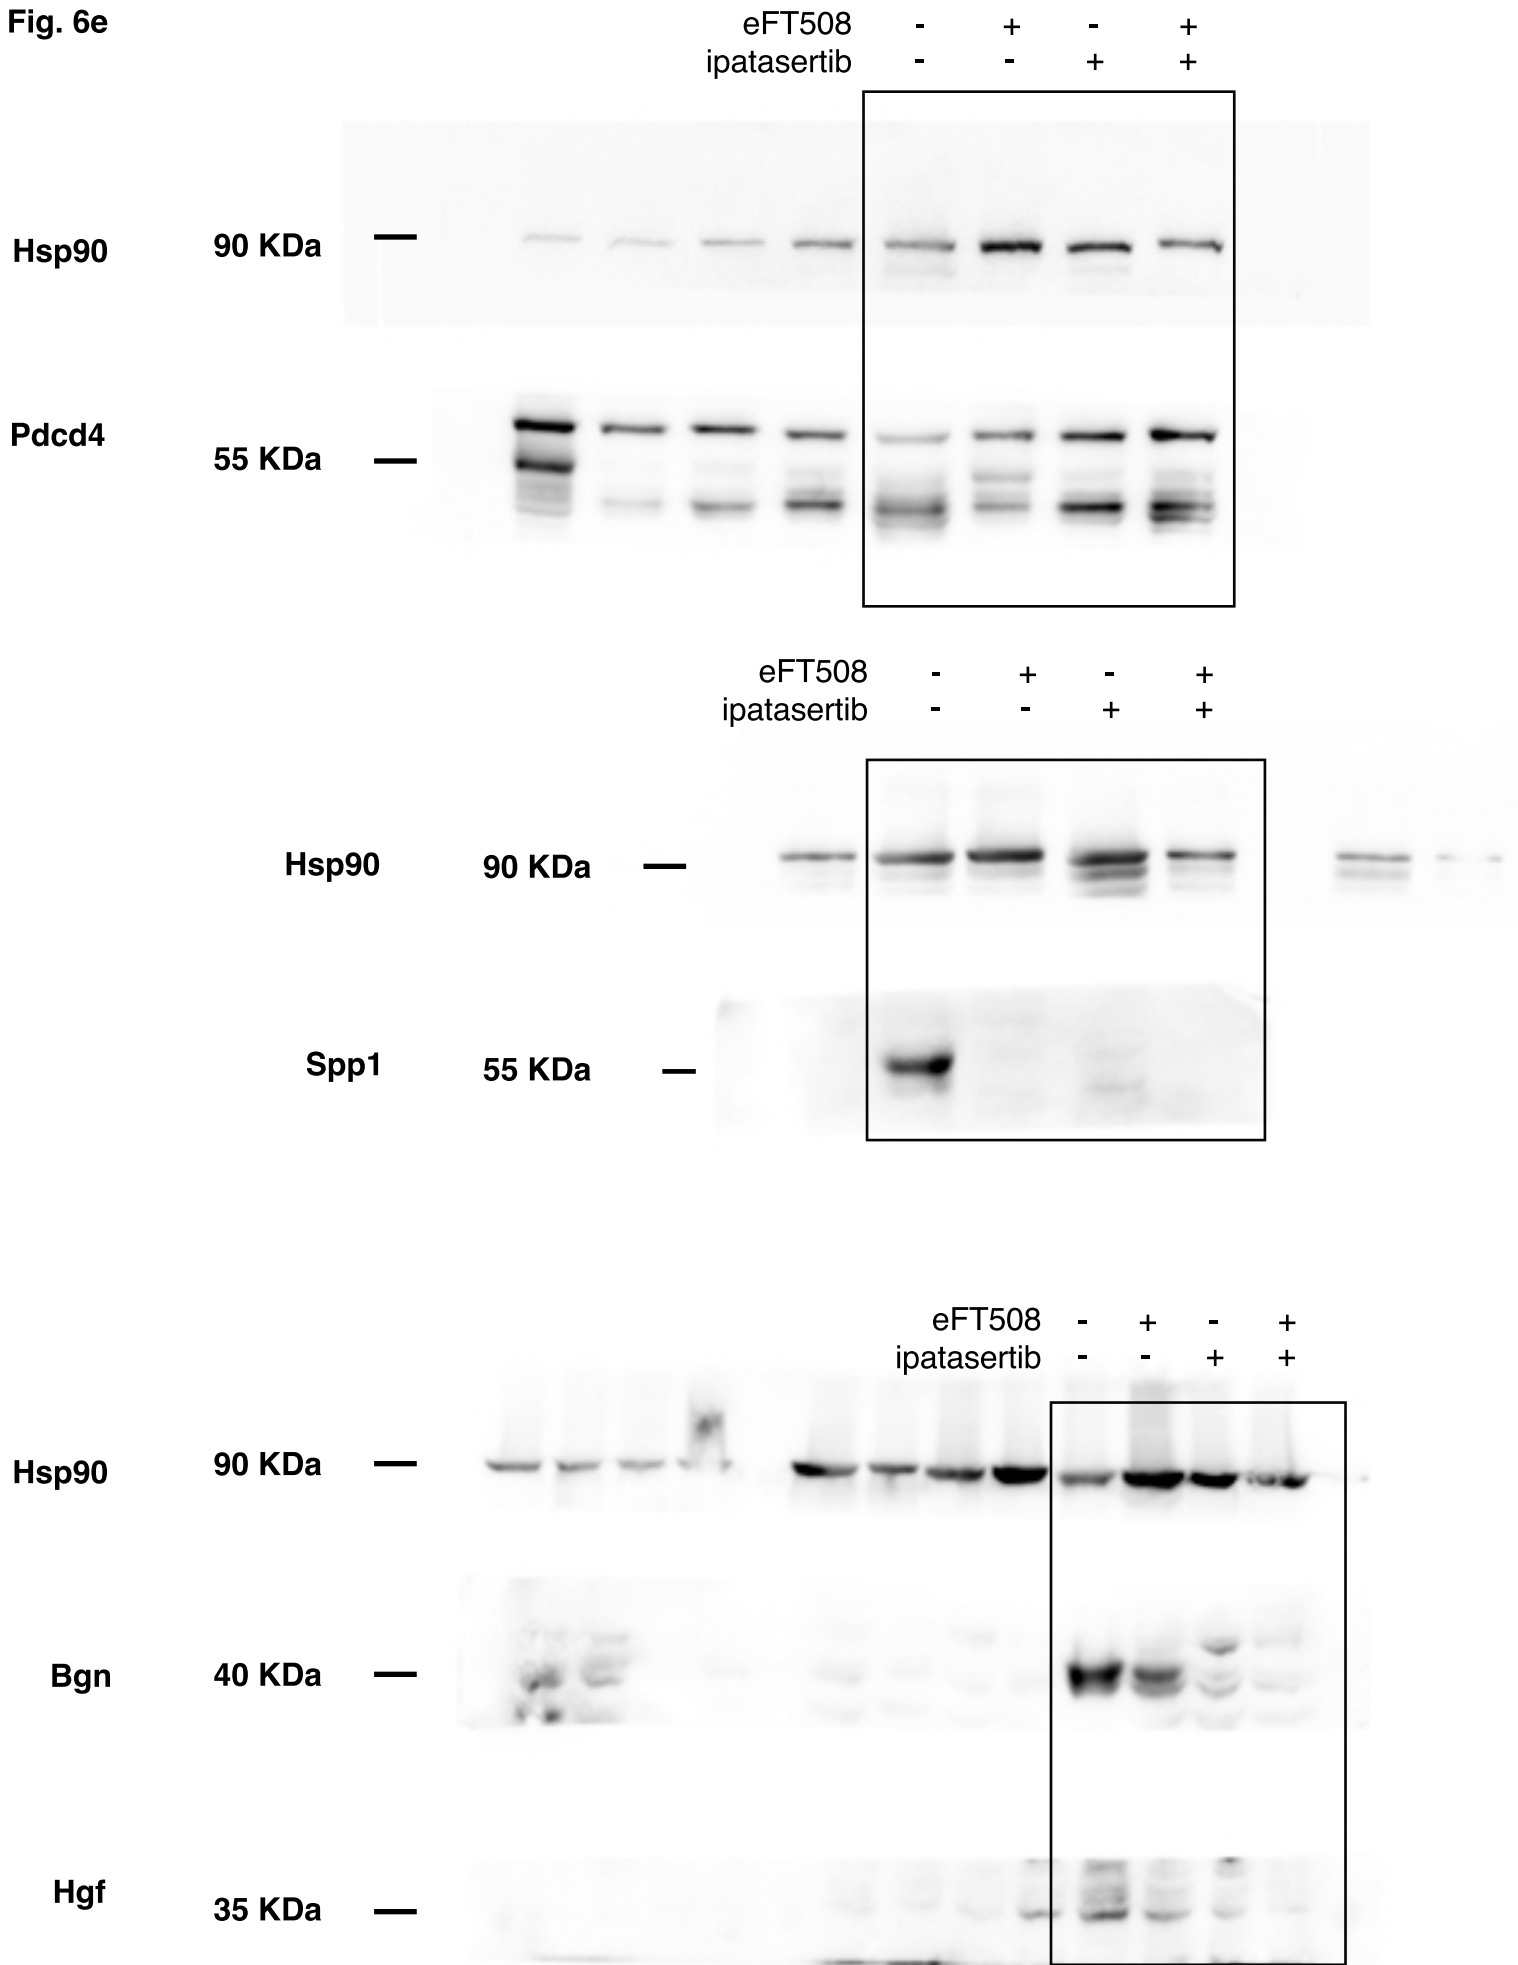

Supplement: NIHMS2010651-supplement-Source_Data_Fig__6_Unprocessed_Western_Blots.pdf [file NIHMS2010651-supplement-Source_Data_Fig__6_Unprocessed_Western_Blots.pdf]
